1 **Precise transcriptional control of cellular quiescence by BRAVO/WOX5 complex in**  
2 **Arabidopsis roots**

3

4 Isabel Betegón-Putze<sup>1,\*</sup>, Josep Mercadal<sup>2,3,\*</sup>, Nadja Bosch<sup>1,\*</sup>, Ainoa Planas-Riverola<sup>1</sup>, Mar  
5 Marquès-Bueno<sup>1</sup>, Josep Vilarrasa-Blasi<sup>1,4</sup>, David Frigola<sup>2</sup>, Rebecca Corinna Burkart<sup>5</sup>, Cristina  
6 Martínez<sup>6</sup>, Yvonne Stahl<sup>5</sup>, Salomé Prat<sup>6</sup>, Marta Ibañes<sup>2,3,§</sup> and Ana I. Caño-Delgado<sup>1,§</sup>

7

8 <sup>1</sup>Department of Molecular Genetics, Centre for Research in Agricultural Genomics (CRAG)  
9 CSIC-IRTA-UAB-UB, Campus UAB (Cerdanyola del Vallès), 08193 Barcelona, Spain.

10 <sup>2</sup>Departament de Matèria Condensada, Facultat de Física, Universitat de Barcelona, 08028  
11 Barcelona, Spain.

12 <sup>3</sup>Universitat de Barcelona Institute of Complex Systems (UBICS), Barcelona, Spain

13 <sup>4</sup>Present address: Department of Biology, Stanford University, 371 Serra Mall, Stanford,  
14 CA94305, USA.

15 <sup>5</sup>Institute for Developmental Genetics, Heinrich-Heine University, Universitätsstraße 1, 40225  
16 Düsseldorf, Germany.

17 <sup>6</sup>Department of Plant Molecular Genetics, Centro Nacional de Biotecnología (CNB), Darwin 3,  
18 Madrid E-28049, Spain.

19 \*, § These authors contributed equally to this work.

20 Corresponding author: [ana.cano@cragenomica.es](mailto:ana.cano@cragenomica.es)

21

22

23

24

25

26

27

28

29 **SUMMARY**

30 Root growth and development are essential features for plant survival and the preservation of  
31 terrestrial ecosystems. In the Arabidopsis primary root apex, stem-cell specific transcription  
32 factors BRAVO and WOX5 co-localize at the Quiescent Center (QC) cells, where they repress  
33 cell division so that these cells can act as a reservoir to replenish surrounding stem cells, yet  
34 their molecular connection remains unknown. Here, by using empirical evidence and  
35 mathematical modeling, we establish the precise regulatory and molecular interactions between  
36 BRAVO and WOX5. We found that BRAVO and WOX5 regulate each other besides forming a  
37 transcription factor complex in the QC necessary to preserve overall root growth and  
38 architecture. Our results unveil the importance of transcriptional regulatory circuits at the  
39 quiescent and stem cells to the control of organ initiation and growth of plant tissues.

40

41

42 **KEYWORDS**

43 Root growth, Brassinosteroids, BRAVO, WOX5, root growth, stem cell, quiescent centre,  
44 mathematical modeling.

45

46

## 47 INTRODUCTION

48 Roots are indispensable organs to preserve plant life and terrestrial ecosystems under normal  
49 and adverse environmental conditions. In *Arabidopsis thaliana* (Arabidopsis), the primary root  
50 derives from the activity of the stem cells located at the base of the meristem in the root apex  
51 (Dolan et al, 1993; van den Berg et al, 1995). The root stem cell niche (SCN) is composed of a  
52 set of proliferative stem cells that surround the mitotically less active cells, named the quiescent  
53 centre (QC) (Scheres, 2007). Proximally to the QC, the vascular stem cells (VSC, also called  
54 vascular initial cells) give rise to functional procambial, xylem and phloem conductive vessels  
55 in the plant (De Rybel et al, 2016). Distally to the QC, the columella stem cells (CSC) give rise  
56 to the columella cells (Figure S1, (Gonzalez-Garcia et al, 2011; Stahl et al, 2009). The QC  
57 prevents differentiation of the surrounding stem cells (van den Berg et al, 1997), and its low  
58 proliferation rate provides a way to preserve the genome from replication errors. It also acts as  
59 a root stem cells reservoir, having the ability of promoting its own division rate to replenish the  
60 stem cells when they are damaged (Fulcher & Sablowski, 2009; Lozano-Elena et al, 2018).

61 BRASSINOSTEROIDS AT VASCULAR AND ORGANIZING CENTER (BRAVO) and  
62 WUSCHEL RELATED HOMEODOMAIN 5 (WOX5) are two transcription factors that are  
63 expressed in the QC and control its quiescence, as mutation of either BRAVO or WOX5  
64 promotes QC cell division (Forzani et al, 2014; Pi et al, 2015; Vilarrasa-Blasi et al, 2014).  
65 BRAVO is an R2R3-MYB transcription factor and besides being expressed at the QC is also  
66 present at the vascular initials (Vilarrasa-Blasi et al, 2014). It was identified as a target of  
67 Brassinosteroid (BR) signaling, being directly repressed by BRI1-EMS-SUPPRESSOR 1  
68 (BES1), one of the main effectors of the BR signaling pathway, altogether with its co-repressor  
69 TOPLESS (TPL) (Espinosa-Ruiz et al, 2017; Vilarrasa-Blasi et al, 2014). WOX5 is a member  
70 of the WUSCHEL homeodomain transcription factor family and it is localized mainly at the QC  
71 and to a lesser extent at the surrounding CSC and vascular initials (Pi et al, 2015; Sarkar et al,  
72 2007). WOX5 can repress QC divisions by repressing CYCLIN D3;3 (Forzani et al, 2014), and

73 in contrast with BRAVO, is also involved in CSC differentiation, as in the *wox5* mutant CSC  
74 differentiate prematurely (Sarkar et al, 2007).

75 Although BRAVO and WOX5 are well-studied plant cell-specific repressors of QC division,  
76 their molecular connection and the biological relevance in SCN proper functioning has not yet  
77 been established. In this study, we set the regulatory and molecular interactions between  
78 BRAVO and WOX5 at the SCN and disclose a common role as regulators of primary and  
79 lateral root growth and development. Our results show that BRAVO and WOX5 promote each  
80 other expressions and can directly bind to form a protein regulatory complex. BRAVO/WOX5  
81 protein interaction underlies their functions as QC repressors to maintain stem cell  
82 development, that is essential for root growth and adaptation to the environment.

83

## 84 **RESULTS**

### 85 **BRAVO and WOX5 control QC division and lateral root density**

86 We have previously shown that *bravo* mutants have a phenotype of increased divisions at the  
87 QC compared to the wild-type (WT) (Vilarrasa-Blasi et al, 2014) (Figure 1A, B), which  
88 resembles the one described for *wox5* mutants (Bennett et al, 2014; Forzani et al, 2014; Sarkar  
89 et al, 2007) (Figure 1C). To address BRAVO and WOX5 interplay at repressing QC divisions,  
90 we generated the double *bravo wox5* mutants (Materials and Methods, Table S1). The double  
91 *bravo wox5* background also exhibited increased cell division compared to the WT (Figure 1A,  
92 D). Importantly, the frequency of divided QC was similar to that of *bravo* and *wox5* single  
93 mutants (Figure 1E). The mutual epistatic effect of these mutations suggests that BRAVO and  
94 WOX5 function interdependently at the WT primary root apex to suppress QC divisions.

95 Previous studies proposed that WOX5 represses CSC differentiation in a non-cell autonomous  
96 manner (Bennett et al, 2014; Sarkar et al, 2007), whereas no link was reported between this  
97 process and BRAVO, since the *bravo* mutants are not defective in CSC differentiation (Figure  
98 1A, B, F). Genetic analysis showed that *bravo wox5* mutants display the same CSC

99 differentiation as *wox5* single mutant (Figure 1A, C, D, F), corroborating that BRAVO does not  
100 control CSC differentiation (Vilarrasa-Blasi et al, 2014).

101 To address whether these stem cell-specific defects account for overall alterations in root  
102 growth and development, root architecture was analyzed. The *bravo wox5* double mutant shows  
103 slightly but significantly shorter roots than the WT (Figure S2A) and fewer lateral root density  
104 (Figure 1G). In the case of the lateral root density, 7-day-old *bravo wox5* seedlings show the  
105 same phenotype as the single mutants (Figure 1G), in agreement with previous reports for *wox5*  
106 (Tian et al, 2014a). Root growth defects become more exaggerated in the *bravo wox5* double  
107 mutant in 10-day-old seedlings (Figure S2B), therefore supporting the joint contributions of  
108 these two transcription factors to overall root growth and architecture.

109

#### 110 ***BRAVO* and *WOX5* reinforce each other at the root stem cell niche**

111 The QC division phenotype of the double *bravo wox5* mutant suggests an interplay between  
112 BRAVO and WOX5 at regulating QC divisions. Such interplay may take place through cross-  
113 regulation of their expressions. Indeed, we have previously shown that *WOX5* expression is  
114 reduced in the *bravo* mutant (Vilarrasa-Blasi et al, 2014), indicating that BRAVO regulates  
115 *WOX5* expression. To gain insight on the mutual regulatory activity of these two transcription  
116 factors, we thoroughly investigated *BRAVO* and *WOX5* expressions at the SCN in the single  
117 mutant and in the double *bravo wox5* mutant backgrounds.

118 In the WT primary root, *BRAVO* expression, reported by the *pBRAVO:GFP* line, is specifically  
119 located in the QC and the vascular initials (Vilarrasa-Blasi et al, 2014) (Figure 2A). The  
120 *pBRAVO* signal was increased in the *bravo* mutant (Figure 2B, H), suggesting that BRAVO  
121 negatively regulates its own expression. In contrast, in the *wox5* mutant, *pBRAVO* expression  
122 was strongly reduced, suggesting that WOX5 promotes *BRAVO* expression (Figures 2C, H).  
123 Inducible expression of WOX5 under the 35S promoter (35S:WOX5-GR) resulted in an

124 increased *BRAVO* expression, as measured by RT-qPCR of root tips (Figure S3A). The fact that  
125 the increase is not as strong as the fold-induction of *WOX5*, suggests that *WOX5* induces  
126 *BRAVO* only within the *BRAVO* native domain. Together, these results support that *WOX5*  
127 activates *BRAVO* expression. Moreover, *pBRAVO* expression was equally reduced in the double  
128 *bravo wox5* mutant (Figure S4), as in the *wox5* mutant (Figure 2C, H), suggesting that *BRAVO*  
129 regulates its own expression aside the induction by *WOX5*. In the primary root, *WOX5*  
130 expression, as reported by the *pWOX5:GFP* line, is known to be mainly restricted to the QC, yet  
131 some expression is detected in the vascular initials (Pi et al, 2015) (Figure 2D). We found that  
132 *bravo* mutant displayed a significant reduction of *WOX5* expression (Figure 2E, I), supporting  
133 that *BRAVO* in turn induces expression of the *WOX5* gene. Further analysis of *WOX5*  
134 expression upon overexpressing *BRAVO* under an inducible 35S promoter (35S:*BRAVO*-Ei)  
135 showed that when *BRAVO* levels were induced, *pWOX5* levels remained similar to the WT,  
136 indicating that *BRAVO* is not able in its own to induce *WOX5* (Figure S3C-G). Together, these  
137 results support that *BRAVO* is necessary to maintain proper *WOX5* levels in the QC but does  
138 not induce them. Subsequently, an increased *pWOX5:GFP* expression towards the provascular  
139 cells was observed in the *bravo wox5* double mutant (Figure 2G), similar to *wox5* mutant  
140 (Figure 2F, I). These findings suggest that *WOX5* restricts its own expression to the QC, while  
141 *BRAVO*-dependent activation of *WOX5* acts upstream such *WOX5* autoregulation.

142 Brassinolide (BL) is the most active BR hormone compound. BL treatment is known to modify  
143 *BRAVO* and *WOX5* expression, by reducing the first and increasing the second of these genes  
144 (Gonzalez-Garcia et al, 2011; Vilarrasa-Blasi et al, 2014) (Figures S4 and S5). We found that  
145 when roots were grown on BL, the changes in *BRAVO* and *WOX5* expressions in *bravo*, *wox5*  
146 and the *bravo wox5* double mutant respect to the WT exhibited the same trends as when plants  
147 were grown in control media without BL (Figures S4 and S5). These results suggest that the  
148 mutual regulation of *BRAVO* and *WOX5*, as well as their autoregulation, is not significantly  
149 altered by BL treatment.

150

151 ***WOX5* induces *BRAVO*, which alleviates *WOX5* self-inhibition**

152 To provide a comprehensive scheme of *BRAVO* and *WOX5* cross-regulation in the SCN able to  
153 account for the changes in expression levels observed in the various mutant backgrounds, we  
154 turned into mathematical modeling (Material and Methods). Because *BRAVO* is induced in the  
155 *WOX5* overexpression line (Figure S3A) and *BRAVO* expression decreases in the *wox5* mutant  
156 (Figure 2C), the model considered that *WOX5* induces (either directly and/or through  
157 intermediate molecules) the expression of *BRAVO* (Figure 3A). To account for the increase in  
158 *pBRAVO* expression in the *bravo* background (Figure 2B), the model assumed that *BRAVO*  
159 drives an effective inhibition on its own expression (Figure 3A), probably in an indirect manner.  
160 The model indicates that these two regulations can drive a decrease in *BRAVO* expression in the  
161 *bravo wox5* double mutant (Figure 3B), as found by the GFP expression data (Figure S4).  
162 Therefore, the model indicates that these two regulations on *BRAVO* are sufficient to account  
163 for its levels of expression in the single and double mutants (Figure 3B).

164 Because *pWOX5* expression in the SCN increases in the *wox5* mutant (Figure 2F), the model  
165 considered that *WOX5* represses (directly or indirectly) its own promoter activity (Figure 3A).  
166 In addition, the model assumed that *BRAVO* inhibits partially this repression (Figure 3A). With  
167 these regulations, the model accounts for the increase of *WOX5* expression in the *bravo* mutant,  
168 as well as for the *WOX5* decreased expression in the *wox5* and *bravo wox5* mutants (Figure 3B),  
169 as we found in the GFP expression studies (Figure 2F,G). Therefore, the model proposes that  
170 *BRAVO* promotes *WOX5* expression by alleviating *WOX5* self-inhibition.

171 With these interactions, the model precisely captures all changes in *BRAVO* and *WOX5*  
172 expression in the *bravo*, *wox5* and *bravo wox5* mutants (Figure 3B, C). In the model, parameter  
173 values were adjusted such that the fold-changes between promoter activities in the single  
174 mutants compared to the WT matched the fold-changes in GFP expressions of our empirical  
175 data (Figure 3C, Material and Methods). In addition, these values were restricted such that  
176 under control conditions *pBRAVO* expression is lower than *pWOX5* expression in the WT

177 (Figure 3B), as suggested by GFP expression (Material and Methods) and RNAseq of the root  
178 tip (Clark et al, 2019).

179 The model indicates that the trends in the changes of expression levels between each mutant and  
180 the WT are maintained when the rate of BRAVO promoter activity decreases and/or the rate of  
181 WOX5 promoter activity is increased (Figure 3C). This is in agreement with the results  
182 obtained upon BL treatment (Figure S4 and S5), which reduces *BRAVO* expression whereas it  
183 increases *WOX5* expression.

184

### 185 **BRAVO and WOX5 directly interact into a transcriptional complex**

186 Our results so far support that BRAVO and WOX5 reinforce each other at the SCN. To further  
187 decipher BRAVO and WOX5 interplay, we next evaluated the possible physical interaction  
188 between the BRAVO and WOX5 proteins. Using Förster resonance energy transfer measured  
189 by fluorescence lifetime microscopy (FRET-FLIM) (Figure 4A-K) and yeast two-hybrid assays  
190 (Figures 4L and S6A) we observed that BRAVO can directly interact with WOX5 (Figure 4B,  
191 G, K and L), which indicates that BRAVO and WOX5 form a transcriptional complex.

192 As we previously demonstrated that the BR-regulated BES1/TPL complex acts as a  
193 transcriptional repressor of BRAVO transcription (Espinosa-Ruiz et al, 2017; Vilarrasa-Blasi et  
194 al, 2014), in addition to BES1 directly interact with BRAVO (Vilarrasa-Blasi et al, 2014), and  
195 TPL is shown to interact with WOX5 (Pi et al, 2015), we further investigated binding of  
196 BRAVO and WOX5 to these transcriptional regulators. We found that both BRAVO and  
197 WOX5 physically interact with BES1, and this interaction was stronger for the active BES1-D  
198 protein (Yin et al, 2002) (Figures 4C, D, H, I, K), consistent with our previous findings that the  
199 of BES1 EAR domain is necessary for BES1/BRAVO interaction (Vilarrasa-Blasi et al, 2014);  
200 Figure S6A). Our analysis shows that BES1 binds to WOX5 (Figures 4H, I, K and S6C) with an  
201 equivalent affinity as to BRAVO (Figures 4K and S6B), and that this interaction is stronger  
202 with BES1-D (Figure 4K). Moreover, both BRAVO and WOX5 were also observed to interact  
203 with the co-repressor TPL (Figures 4E, J, K, L and S6). Collectively, these data show that



204 BRAVO and WOX5 directly interact to form a transcriptional complex, and that each can bind  
205 active BES1 and TPL, suggesting these proteins are able to compete for their mutual binding.

206

### 207 **BRAVO-WOX5 complex is relevant for the control of QC divisions**

208 The equal divided QCs in the double *bravo wox5* mutant compared to the single mutants  
209 (Figure 1A-E) suggests that BRAVO and WOX5 interplay at repressing QC divisions. We  
210 found two ways for this interplay to take place: through mutual regulation of their expressions  
211 (Figures 2, 3A) and through the formation of a protein BRAVO-WOX5 complex (Figure 4A-  
212 K). We turned into mathematical modeling to assess the contribution of each of these  
213 regulations to the phenotype of divided QCs (Material and Methods). We set a regulatory  
214 function for the frequency of divided QCs that explicitly incorporates the individual  
215 contributions mediated by BRAVO ( $T_B$ ) and by WOX5 ( $T_W$ ) and the jointly mediated  
216 contribution by both BRAVO and WOX5 together (hereafter named “joint contribution”,  $T_{BW}$ )  
217 (Material and Methods). In this regulatory function, the joint contribution ( $T_{BW}$ ) is the one that  
218 takes into account the existence of the BRAVO-WOX5 complex. In contrast, the mutual  
219 regulations of *BRAVO* and *WOX5* expressions act independently from the joint contribution and  
220 are only included in the individual contributions (i.e.  $T_B$  and  $T_W$ ). Specifically, since *WOX5*  
221 expression decreases in the *bravo* mutant (Figure 2I), we reasoned that individual *WOX5*  
222 repression of QC divisions is attenuated by a factor  $q_W^{Bm} < 1$  in the *bravo* mutant compared to  
223 the WT (Material and Methods). Similarly, to take into account the regulation that *WOX5*  
224 makes on *BRAVO* expression, we considered that the individual contribution by BRAVO was  
225 attenuated by a factor  $q_B^{Wm}$  in the *wox5* mutant compared to that in the WT ( $q_B^{Wm} < 1$ ). Because  
226 the extent of these attenuations and hence the values of  $q_W^{Bm}$  and  $q_B^{Wm}$  (which range from 0 to  
227 1) cannot be measured, we estimated them through the fold-changes in expression in the  
228 mutants as follows (Materials and Methods). We used  $q_W^{Bm} = 0.8$ , which is similar to the fold-  
229 change of *WOX5* expression in the *bravo* mutant compared to the WT (Figures 2I, 3C). The fact  
230 that *wox5* exhibits phenotypes that are absent in the *bravo* mutant, such as CSC differentiation,

231 also suggests that  $q_W^{Bm}$  is not too small. The estimate for  $q_B^{Wm}$  based on the fold-change of  
232 *BRAVO* expression in the *wox5* mutant is  $q_B^{Wm}=0.5$  (Figures 2H, 3C). Yet, from the root  
233 phenotypes of the mutants we cannot exclude other, e.g. smaller, values. Therefore we  
234 evaluated the model results for different values of  $q_B^{Wm}$ .

235 We used the experimental data on the frequency of divided QCs in the WT, the single mutants  
236 and the double mutant (Figure 1E), with an estimation of their confidence intervals (Material  
237 and Methods), to extract which are the individual contributions (i.e. the *BRAVO*-mediated and  
238 the *WOX5*-mediated) as well as the joint *BRAVO*-*WOX5* contributions in the WT (Material  
239 and Methods). For intermediate  $q_B^{Wm}$  values ( $q_B^{Wm} > 0.4$  upwards, being  $q_B^{Wm}=0.5$  the estimate  
240 from fold-change *BRAVO* expression in the *wox5* mutant), the model results show that in the  
241 WT the joint contribution of *BRAVO*-*WOX5* is the only one relevant (Figure 5A). Therefore,  
242 the analysis indicates that the joint *BRAVO*-*WOX5* contribution is essential to describe the QC  
243 division data if *BRAVO* and *WOX5* control each other action on QC division only partially.  
244 Individual *BRAVO* contribution becomes relevant only for small  $q_B^{Wm}$  values, i.e. only if  
245 *BRAVO*'s role on QC division is mostly controlled by *WOX5*. Yet in this scenario, which  
246 would correspond to *BRAVO* acting downstream of *WOX5* to repress QC divisions, the model  
247 indicates that the joint contribution of *BRAVO* and *WOX5* is also relevant to the regulation of  
248 QC divisions in the WT, regardless of its specific activatory/inhibitory role (Figure 5A). Taken  
249 together, our analyses highlight the significant contribution of the *BRAVO*/*WOX5*  
250 heterodimeric complex in the control of QC divisions, to the preservation of the normal growth  
251 and development of primary and lateral root organs in the plant.

252

## 253 **DISCUSSION**

254 In the *Arabidopsis* primary root, *BRAVO* and *WOX5* are two transcription factors that repress  
255 QC divisions and whose expressions co-localize mostly at the QC (Forzani et al, 2014;  
256 Vilarrasa-Blasi et al, 2014). Our results show that *BRAVO* and *WOX5* interplay at different

257 levels to repress QC divisions. In addition, we show that the joint action of these cell-specific  
258 transcription factors promotes overall root growth and development.

259 Our data indicate that BRAVO and WOX5 mutually promote each other's expressions. Hence,  
260 neither of them is downstream the other, yet their mutual regulations are very distinct. While  
261 WOX5 is able to induce *BRAVO*, BRAVO does not directly induce *WOX5* expression but it  
262 drives partial inhibition of *WOX5* self-regulation. These different regulatory mechanisms and  
263 the quantitative changes in gene expression they drive, suggest that the effect WOX5 on  
264 *BRAVO* and thereby on BRAVO-mediated regulation can be more relevant than the effect  
265 BRAVO has upon *WOX5* and WOX5-mediated action. This is consistent with the known SCN  
266 phenotypes of *bravo* and *wox5* mutants (Bennett et al, 2014; Forzani et al, 2014; Pi et al, 2015;  
267 Sarkar et al, 2007; Vilarrasa-Blasi et al, 2014), where *wox5* exhibits, besides a similar increased  
268 QC division phenotype as *bravo*, an overall distorted and disorganized SCN morphology and  
269 CSC premature differentiation that is absent in the *bravo* mutant.

270 The mutual regulation between BRAVO and WOX5 involves WOX5 inhibition of its own  
271 expression while it induces that of *BRAVO*, which in turn reverses WOX5 self-repression.  
272 Based on our data, it can be suggested that *WOX5* self-inhibition is through WOX5 bound to  
273 TPL and that BRAVO attenuates it by competing with TPL for binding WOX5. Moreover,  
274 BRAVO is found to ultimately down-regulate its own expression, although this probably occurs  
275 through other intermediate molecules, as BRAVO has been shown to activate itself by directly  
276 binding its own promoter (Vilarrasa-Blasi et al, 2014). By evaluating expression changes  
277 between the WT and the mutants we gained information on the overall BRAVO-WOX5  
278 regulatory system. Its regulation results from the direct binding of these proteins to their  
279 promoters and from the transcriptional control driven by them, as far as these proteins bind each  
280 other and to additional regulators. Hence, interactions here described are effective in the sense  
281 that they are the result of multiple, direct and indirect, regulatory mechanisms. For instance,  
282 *WOX5* self-repression can also involve a negative feedback where WOX5 activates a repressor  
283 or represses an activator, among other possibilities. In this context, control of auxin-ARF and

284 auxin-IAA (Tian et al, 2014b) as well as the PLETHORA genes (Burkart et al, 2019) were all  
285 shown to involve negative feedbacks with *WOX5*. *WOX5* induction of *BRAVO* expression  
286 could be as well through a downstream target of *WOX5*.

287 Another important molecular link between *BRAVO* and *WOX5* as revealed by our data is their  
288 physical protein-protein interaction. The QC is where these two transcription factors mostly co-  
289 localize, which suggests that they act as co-partners of a single complex only in the QC, where  
290 they converge. The consistent and overlapping role of *BRAVO* and *WOX5* at promoting lateral  
291 root development also points to a relevant role of the *BRAVO*-*WOX5* complex for this  
292 function.

293 Our analysis supports that QC division is controlled via *BRAVO*-*WOX5* joint regulation,  
294 besides an additional regulation individually mediated by *BRAVO*. This joint regulation is  
295 expected to be mediated by *BRAVO*-*WOX5* physical interaction. This scenario explains the  
296 phenotype of increased divisions at the QC upon BL treatment (Gonzalez-Garcia et al, 2011),  
297 by the response of *BRAVO* and *WOX5* to this treatment and their respective roles as repressors  
298 of QC divisions. Actually, although the intensity and domain of expression of *WOX5* increases  
299 in roots grown in BL medium, at the same time the BL treatment strongly represses *BRAVO*  
300 (Vilarrasa-Blasi et al, 2014). Hence, in the absence of its partner *BRAVO*, *WOX5* no longer  
301 represses QC divisions in roots grown on BL. At a mechanistic level, the *BRAVO*-*WOX5*  
302 protein complex may bind *CYCLIN-D3:3*, as shown to occur for *WOX5* (Forzani et al, 2014).

303 Interestingly, we also found that *BRAVO* and *WOX5* promote root growth and lateral root  
304 development. In LR development, the formation of the organizing center and the stem cell niche  
305 occurs after LR initiation (Banda et al, 2019). A high number of genes are commonly expressed  
306 at the SCN of primary and lateral roots, such as *PLT*, *SHR*, *SCR* or *TCP* (Goh et al, 2016;  
307 Shimotohno et al, 2018). Loss-of function of these genes leads to an increased number of  
308 aberrant lateral roots and reduced levels of *WOX5* (Shimotohno et al, 2018), and thus it is  
309 possible that *BRAVO*/*WOX5* complex not only controls stem cell niche maintenance in the  
310 primary root, but also in the lateral roots.

311 Finally, our study sets a framework for future studies on the interplay between WOX5 and BR  
312 signaling in the control of CSC differentiation. WOX5 is known to repress CSC differentiation  
313 (Pi et al, 2015; Sarkar et al, 2007). However, upon BL treatment, and in *bes1-D* gain of function  
314 mutants, CSC differentiate prematurely (Gonzalez-Garcia et al, 2011), in apparent contradiction  
315 with the inhibitory role associated with WOX5, and its induced expression in these roots. One  
316 option comes from assuming that BL-induced CSC differentiation is independent from WOX5  
317 and overrides WOX5-mediated repression. In this case, a tug-of-war between WOX5-mediated  
318 repression and BL-dependent activation of CSC differentiation would tip the balance in favor of  
319 BR-action. Another possibility is that BR downstream effectors such as BES1-D inactivate  
320 WOX5 and/or impede its function. An increase of BES1-D by BL may boost WOX5  
321 sequestration into WOX5-BES1-D complexes, since we showed that WOX5 and BES1-D  
322 physically interact. Assuming these complexes inactivate WOX5 function, CSC differentiation  
323 would no longer be repressed by WOX5 in the presence of BL. Moreover, the fact that BES1-D  
324 directly interacts with TOPLESS, and this co-repressor also recruited by WOX5 to the  
325 inhibition of CSC differentiation (Pi et al, 2015), suggest that in plants treated with BL WOX5  
326 function may further impaired by most of TPL being bound to BES1-D.

327 To conclude, understanding of signaling networks operating in stem cell development is  
328 becoming essential to decipher plant growth and adaptation to the environment. Systems  
329 biology approaches provide a closer picture to reality unveiling how complex and dynamics  
330 network of cell-specific transcription factors act to preserve stem cell function in plants. Here,  
331 untapping the action of two main regulators of quiescent cell division, BRAVO and WOX5, not  
332 only discloses that these factors operate as a transcriptional complex in preserving stem cell  
333 function, but also unveils their joint roles in primary and lateral root development.

334

### 335 **AUTHOR CONTRIBUTIONS**

336 A.I.C-D. and M.I. designed and supervised the study. I.B-P., N.B., A.P-R, J.V-B. and M.M-B.  
337 performed the experiments. J.M., D.F. and M.I. performed the mathematical modeling. Y.S. and

338 R.C.B. performed and analysed the FRET-FLIM assays. S.P. and C.M. collaborated in the Y2H  
339 and BiFC assays. I.B-P., J.M., N.B., M.I. and A.I.C-D. wrote the manuscript and all authors  
340 revised the manuscript.

341

## 342 **ACKNOWLEDGMENTS**

343 A.I.C-D. is a recipient of a BIO2016-78955 grant from the Spanish Ministry of Economy and  
344 Competitiveness and a European Research Council, ERC Consolidator Grant (ERC-2015-CoG  
345 – 683163).

346 N.B. is funded by the FI-DGR 2016FI\_B 00472 grant from the AGAUR, Generalitat de  
347 Catalunya; I.B-P. by the FPU15/02822 grant from the Spanish Ministry of Education, Culture  
348 and Sport; and A.P-R. by the SEV-2015-0533 from the Severo Ochoa Programme for Centers  
349 of Excellence in R&D. M.I. and J.M. acknowledge support from the Spanish Ministry of  
350 Economy and Competitiveness and FEDER (EU) through grant FIS2015-66503-C3-3-P, from  
351 Ministerio de Ciencia, Innovación y Universidades / Agencia Estatal de Investigación / Fondo  
352 Europeo de Desarrollo Regional, Unión Europea through grant PGC2018-101896-B-I00 and  
353 from the Generalitat de Catalunya through Grup de Recerca Consolidat 2014 SGR 878 and  
354 2017 SGR 1061. J.M. is funded by the Spanish Ministry of Education through BES-2016-  
355 078218. Y.S. and R.C.D. are funded by the Deutsche Forschungsgesellschaft (DFG) (grant  
356 STA12/12 1-1). CRAG is funded by “Severo Ochoa Programme” from Centers of Excellence in  
357 R&D 2016-2019 (SEV-2015-485 0533).

358

## 359 **MATERIAL AND METHODS**

### 360 **Plant Material and Root Measurement**

361 All WT, mutants and transgenic lines are in the Arabidopsis ecotype Columbia (Col-0)  
362 background (Table S2). The double mutant *bravo wox5* was generated by crossing the *bravo*  
363 and *wox5* single mutants. The double mutant homozygous lines were selected by genotyping.  
364 The primers used for *bravo* and *wox5* genotyping are listed in Table S3.

365 Seeds were surface sterilized and stratified at 4°C for 48 hours before being plated onto 0.5X  
366 Murashige and Skoog (MS) salt mixture without sucrose and 0.8% plant agar, in the absence or  
367 presence of Brassinolide (Wako, Osaka, Japan).  $\beta$ -estradiol (30  $\mu$ M) from Sigma diluted in  
368 DMSO was used to induce BRAVO expression for 6 days. Dexamethasone (1  $\mu$ M) from Sigma  
369 diluted in EtOH was used to induce WOX5 expression for 6 days. For RT-qPCR experiments  $\beta$ -  
370 estradiol and dexamethasone treatments were applied for 24 hours.

371 Plates were incubated vertically at 22°C and 70% humidity in a 16 hours light/8 hours dark  
372 cycle. Primary root length was measured from plates images, using ImageJ  
373 (<https://imagej.nih.gov/ij/>) and MyROOT (Betegon-Putze et al, 2019) softwares. The lateral root  
374 density was calculated by dividing the total number of emerged lateral roots of individual  
375 seedlings by the mean of the root length of those seedlings.

376

### 377 **Confocal Microscopy and Quantification of Fluorescence Signal**

378 Confocal images were taken with a FV 1000 Olympus confocal microscope after Propidium  
379 iodide (PI, 10  $\mu$ g/ml) staining. PI and GFP were detected with a band-pass 570-670 nm filter  
380 and 500-545 nm filter, respectively. Images were taken in the middle plane of 6-day-old roots.  
381 The fluorescence intensity was quantified with ImageJ using the Integrated Density value  
382 obtained from individual plants. The quantified area was selected with a ROI that contained the  
383 SCN (Figure S6). The laser settings for *pBRAVO*:GFP and *pWOX5*:GFP are different, as WOX5  
384 has a stronger expression than BRAVO. The analysis of *pBRAVO*:GFP in *bravo wox5* double  
385 mutant background was done with different confocal settings. The analysis of QC cell division  
386 and CSC differentiation was carried out by imaging fixed roots through a modified  
387 pseudoSchiff (mPS-PI) staining method (Truernit et al, 2008). Images were processed with the  
388 Olympus FV (Olympus, Tokio, Japan) and ImageJ software.

389

### 390 **RT-qPCR assay**



391 RNA was extracted from root tip tissue with the Maxwell® RSC Plant RNA Kit (Promega)  
392 using the Maxwell® RSC instrument (Promega) according to the manufacturer's  
393 recommendations, and concentrations were checked using NanoDrop 1000 Spectrophotometer  
394 (Thermo Fisher Scientific). cDNA was obtained from RNA samples by using the NZY First-  
395 Strand cDNA Synthesis Kit (NZYtech) according to the manufacturer's recommendations. RT-  
396 qPCR amplifications were performed from 10 ng of cDNA using SYBR Green I master mix  
397 (Roche) in 96-well plates according to the manufacturer's recommendations. The RT-qPCR was  
398 performed on a LightCycler 480 System (Roche). *ACTIN2* (AT3G18780) was used as  
399 housekeeping gene for relativizing expression. Primers used are described in Table S3.

400

#### 401 **Yeast two-hybrid assay**

402 Yeast two-hybrid assays were performed by the Matchmaker GAL4-based two-hybrid System  
403 (Clontech). Constructs were co-transformed into the yeast strain AH109 by the lithium acetate  
404 method (Gietz & Woods, 2002). The presence of the transgenes was confirmed by growth on  
405 SD-LW plates, and protein interaction was assessed by selection on SD-LWH plates.  
406 Interactions were observed after 4 days of incubation at 30°C.

407

#### 408 **Transient expression in *Nicotiana benthamiana* for FLIM measurements**

409 Preparation of transiently expressing *Nicotiana benthamiana* leaves and induction of fusion  
410 proteins tagged with either mVenus or mCherry by application of  $\beta$ -estradiol was carried out as  
411 described in (Bleckmann et al, 2010).

412

#### 413 **Acquisition of FLIM data**

414 FLIM data acquisition was carried out using a confocal laser scanning microscope (LSM780  
415 inverted microscope, Zeiss) equipped additionally with a time-correlated single-photon counting  
416 device with picosecond time resolution (Hydra Harp 400, PicoQuant). mVenus was excited at  
417 485 nm with a pulsed (32 MHz) diode laser at 1.2  $\mu$ W at the objective (40 x water immersion,  
418 C-Apochromat, NA 1.2, Zeiss). The emitted light was collected through the same objective and



419 detected by SPAD detectors (PicoQuant) using a narrow range bandpass filter (534/35, AHF).  
420 Images were taken at 12.5  $\mu$ s pixel time and a resolution of 138 nm/pixel in a 256x256 pixel  
421 image. A series of 40 frames was merged into one image and analysed using the Symphotime  
422 software package (PicoQuant).

423

#### 424 **Analyses and presentation of FLIM data**

425 The fluorescent lifetime of the collected photons in each merged image was analysed using the  
426 Symphotime software (PicoQuant). For this, a ROI covering the whole nucleus was created to  
427 reduce background fluorescence. All photons in this ROI were used to build a histogram of the  
428 fluorescence decay. A double-exponential fit model was used to approximate the intensity-  
429 weighted average fluorescence lifetime  $\tau$  [ns] of all photons of the ROI. The instrument  
430 response function was measured with KI-quenched erythrosine and used for reconvolution in  
431 the fitting process (Weidtkamp-Peters & Stahl, 2017). The data from replicate measurements  
432 was summarized in box plots created in R software (<https://www.r-project.org/>). Statistical  
433 significance was tested by one-way ANOVA with a Sidakholm post-hoc test. Different letters  
434 indicate statistically significant differences ( $p < 0.01$ ).

435 For the creation of FLIM images, photons from individual pixels of a merged image were  
436 analysed for fluorescent lifetime using the Symphotime software (PicoQuant). A mono-  
437 exponential fit model was used, as the photon number in each pixel was too low for a double-  
438 exponential model (Stahl et al, 2013). The individual pixels are colour-coded according to their  
439 fluorescence lifetime.

440

#### 441 **Bimolecular fluorescence complementation assay (BiFC)**

442 The *BRAVO* and *WOX5* coding sequences were inserted by LR-reaction (Invitrogen) into pBiFC  
443 binary vectors containing the N- and C- terminal YFP fragments (YFPN43 and YFPC43).  
444 Plasmids were transformed into the *Agrobacterium tumefaciens* GV3101 strain and appropriate

445 combinations were infiltrated into *Nicotiana benthamiana* leaves (Occhialini et al, 2016). The  
446 p19 protein was used to suppress gene silencing. Infiltrated leaves were imaged two days after  
447 infiltration using an Olympus FV1000 laser scanning confocal microscope.

448

#### 449 **Mathematical model of BRAVO and WOX5 effective regulations**

450 We considered a model for the effective regulations that BRAVO and WOX5 perform on each  
451 other and on themselves in the SCN. In the model,  $B$  and  $W$  account for the total *BRAVO* and  
452 *WOX5* expression in the whole SCN. These expression levels are considered to be the product  
453 of the BRAVO and WOX5 promoter activities according to the following wild-type dynamics:

$$454 \quad \frac{dB}{dt} = P_B(B, W) - d_B B,$$

$$455 \quad \frac{dW}{dt} = P_W(B, W) - d_W W,$$

456 where  $P_B(B, W)$  and  $P_W(B, W)$  are the BRAVO and WOX5 promoter activities (production  
457 terms) respectively and  $d_B B$  and  $d_W W$  are the decay terms (assumed linear for simplicity, with  
458 decay rates  $d_B$  and  $d_W$ ). To account for the regulation of the expression, each promoter activity  
459 depends on *BRAVO* and *WOX5* expressions. To compare with empirical data, we only  
460 considered the stationary state of the above dynamics (i.e. when time derivatives are equal to  
461 zero,  $\frac{dB}{dt} = 0, \frac{dW}{dt} = 0$ ). In the stationary state, *BRAVO* expression is proportional to BRAVO  
462 promoter activity ( $B = P_B(B, W)/d_B$ ) and *WOX5* expression is proportional to WOX5  
463 promoter activity ( $W = P_W(B, W)/d_W$ ). Therefore, we used the promoter activity in the  
464 stationary state as the computational model read-out to be compared with the empirical data on  
465 *pBRAVO:GFP* and *pWOX5:GFP*.

466 Promoter activity terms  $P_B(B, W)$  and  $P_W(B, W)$  correspond to functions that describe the  
467 effective regulations that each expression ultimately performs on each promoter activity (see  
468 Figure 3A for a cartoon of these regulations). These effective regulations involve several  
469 intermediate steps, including translational and post-translational processes, and additional  
470 molecules. These are not explicitly modelled but are all together absorbed in the functionalities

471 of  $P_B(B, W)$  and  $P_W(B, W)$ . We expect these functions to be non-linear and we used  
472 continuous Hill-like functions exhibiting saturation with exponents larger than 1 (see parameter  
473 values in Table S1);

$$P_B(B, W) = \alpha \frac{1 + \varepsilon_B (K_B B)^2}{1 + (K_B B)^2} \frac{1 + \varepsilon_W (K_W W)^2}{1 + (K_W W)^2}$$
$$P_W(B, W) = \gamma \frac{1}{W_0^2 + W^2 \left( \frac{1}{B^2 + B_0^2} + W_1 \right)^2}$$

474 The BRAVO promoter activity  $P_B(B, W)$  has: i) a basal production rate  $\alpha$ , independent of  
475 BRAVO and WOX5 expressions since our GFP data show that BRAVO promoter has activity in  
476 the double mutant *bravo wox5* (Figure S2). ii) A term that sets the activation of BRAVO  
477 expression by WOX5, with WOX5 expression threshold value  $1/K_W$  and activation strength  $\varepsilon_W$   
478  $> 1$ . According to this term, the production of BRAVO increases to  $\alpha \varepsilon_W > \alpha$  if WOX5  
479 expression is very high ( $W \gg 1/K_W$ ) and there is no BRAVO. iii) A term that accounts for the  
480 reduction of BRAVO expression by itself, with BRAVO expression threshold value  $1/K_B$  and  
481 inhibition strength  $\varepsilon_B < 1$ . According to this term, the production of BRAVO decreases to  $\alpha \varepsilon_B$   
482  $< \alpha$  when BRAVO is very high ( $B \gg 1/K_B$ ) and there is no WOX5. The WOX5 promoter activity  
483  $P_W$  has: i) a basal production in the absence of BRAVO and WOX5 expressions of value  $\gamma/W_0^2$ ;  
484 ii) WOX5 expression ultimately represses its own production. iii) Part of this self-repression is  
485 dependent on BRAVO, which reduces the strength of WOX5 self-repression. iv) The parameters  
486  $W_0, B_0$  and  $W_1$  set a measure of the characteristic WOX5 and BRAVO expressions for which  
487 these regulations can have an effect.

488

### 489 **Modeling of the mutants**

490 To model the mutants we used the same equations and parameter values as for the WT with the  
491 only changes being: in the  $M$  background ( $M$  can be either *bravo*, *wox5* or *bravo wox5*) the  
492 expression of the mutated gene is null at all times ( $M=0$ ), despite its promoter activity  $P_M$  is  
493 nonzero, and is computed according to the promoter function  $P_M$  as defined for the WT but with

494  $M=0$ . No additional changes (e.g. no changes in parameter values) were considered to occur in  
 495 the mutants. The model equations for all the mutants are detailed in Supp. Text. Herein we  
 496 exemplify only the model for the *bravo* mutant (where the superscript  $Bm$  is used to denote this  
 497 mutant):

$$498 \quad B^{Bm} = 0, \quad P_B(0, W^{Bm}) = \alpha \frac{1 + \varepsilon_W (K_W W^{Bm})^2}{1 + (K_W W^{Bm})^2}$$

$$499 \quad \frac{dW^{Bm}}{dt} = P_W(0, W^{Bm}) - d_W W^{Bm}, \quad P_W(0, W^{Bm}) = \gamma \frac{1}{W_0^2 + W^{Bm} \left( \frac{1}{B_0^2} + W_1 \right)^2}$$

500 To compare with empirical data on GFP expression in the mutants, we only considered the  
 501 stationary state of the mutants models (see detail in Supp. Info Text).

502

### 503 **Comparison of model outputs with empirical data on GFP expression**

504 Model outputs of the promoter activities (production terms),  $P_B$  and  $P_W$ , obtained at the  
 505 stationary state (i.e. when time-derivatives are equal to zero) were those used for comparison  
 506 with the GFP data measured in the whole SCN. The superindexes  $WT$ ,  $Bm$ ,  $Wm$  and  $dm$  were  
 507 used to refer to the promoter in the stationary state for the WT, the *bravo* mutant, the *wox5*  
 508 mutant and the double mutant, respectively (Supp. Info Text). Since GFP scale is arbitrary with  
 509 respect to promoter activity, we used the ratios that set the fold-change between mutant and the  
 510 WT as the relevant measure to be compared between model outputs and empirical data. For the  
 511 empirical data we used the median GFP measured values and computed the ratio of the median  
 512 GFP expression in the mutant over the median GFP expression data in the WT, for each mutant.  
 513 For the model, we computed the ratios of the stationary production in each mutant over its  
 514 stationary production value in the WT:

$$\sigma_B = \frac{P_B^{Bm}}{P_B^{WT}}, \quad \sigma_B^\dagger = \frac{P_B^{Wm}}{P_B^{WT}}, \quad \sigma_B^{\dagger\dagger} = \frac{P_B^{dm}}{P_B^{WT}}$$

$$\sigma_W = \frac{P_W^{Wm}}{P_W^{WT}}, \quad \sigma_W^\dagger = \frac{P_W^{Bm}}{P_W^{WT}}, \quad \sigma_W^{\dagger\dagger} = \frac{P_W^{dm}}{P_W^{WT}}$$

515 where the subscript in  $\sigma$  indicates the promoter that is analyzed (whether it is that of BRAVO  
 516 or WOX5) and the superscript is informative on the mutant: no superscript is used when the

517 ratio is evaluated in the background of the gene whose promoter is studied; superscript  $\dagger$  is used  
518 when the mutation is on a different gene than the one driven by the promoter;  $\dagger\dagger$  indicates the  
519 double mutant. Parameter values in Eq.1 (Table S1) were chosen such that the values of these  
520 ratios obtained from the model fit the ratios computed from the median GFP expression values  
521 (Figure 3C). Since the GFP data is a broad distribution, there is a broad range of parameters in  
522 which the model fits the experiments within the range of experimental deviations. In addition,  
523 the model reproduces for a wide range of parameter values whether these ratios are  $>1$  (i.e. in  
524 the mutant, the promoter activity increases) or  $<1$  (i.e. in the mutant, the promoter activity  
525 decreases).

526 Notice that based on the model equations, the following equality is found for the model outputs  
527  $\sigma_W^\dagger = \sigma_W^{\dagger\dagger}$  (since regulation of *WOX5* by *BRAVO* is set through *WOX5*). For *BRAVO*,  $\sigma_B^\dagger \neq$   
528  $\sigma_B^{\dagger\dagger}$  since *BRAVO* is set to self-repress, although in the range of parameters chosen both ratios  
529 are rather similar.

530 Additionally, the model outputs were numerically computed for different values of  $\alpha$  and  $\gamma$  (all  
531 the remaining parameter values being unchanged), to model different conditions of the growth  
532 medium. Specifically, we set  $\alpha$  and  $\gamma$  as functions of an auxiliary control parameter  $x$  that  
533 indicates the medium condition ( $x=1$  corresponds to CTL conditions, whereas higher  $x$  values  
534 correspond to a medium with BL). We used  $\alpha=0.3/x$  and  $\gamma=250x/(x+9)$ , such that for  $x=1$   $\alpha$  and  
535  $\gamma$  take the values of the WT in CTL conditions (for  $x=1$ ,  $\alpha$  and  $\gamma$  take the values in Table S1).  
536 Roughly,  $x$  controls the disparity between the basal production of *BRAVO* and *WOX5*. This  
537 allows us to interpret high values of  $x$  as the effect of BL.

538

### 539 **Numerical methods to obtain model outputs**

540 In the stationary state (i.e. when time-derivatives are equal to zero), the model for the WT  
541 reduces to a system of two coupled algebraic equations and for each mutant to a single algebraic  
542 equation (see Supp. Text). To find the stationary stable solutions we solved these algebraic

543 equations numerically with custom-made software and using the `fsolve` routine embedded in  
544 Python (Python Software Foundation, <https://www.python.org/>), which uses a modification of  
545 Powell's hybrid method for finding zeros of a system of nonlinear equations. The temporal  
546 evolution in Figure 3B was computed using `odeint` function embedded in Python (Python  
547 Software Foundation, <https://www.python.org/>) for the WT and for each mutant.

548

#### 549 **Estimation of the error in the QC division data**

550 We denote by  $a, b, c$  and  $d$  the values that we obtain empirically for the percentage of roots that  
551 exhibit a divided QC in the WT, the *bravo* mutant, the *wox5* mutant and the double *bravo wox5*  
552 mutant respectively ( $a=0.3939$ ,  $b=0.8732$ ,  $c=0.8070$ ,  $d=0.8846$ ). We can estimate the error in  
553 each of these measures, by assuming our measurement for each genotype corresponds to  $N$   
554 independent equivalent roots where we observe whether the QC exhibits any division or not (i.e.  
555 we have  $N$  independent Bernoulli experiments). By assuming that the probability of observing  
556 a QC with at least one cell divided is  $p$  ( $p=a, b, c, d$  for each of the genotypes under study) we can  
557 estimate the error. Specifically, we assumed  $p = N_k/N$ , where  $N_k$  is the number of roots, from  
558 the total  $N$  of the specific genotype, that have a divided QC and set the error as the standard  
559 deviation of  $p = \frac{N_k}{N}$  :  $\delta p \equiv \text{std} \left( p = \frac{N_k}{N} \right) = \sqrt{\frac{p(1-p)}{N}}$ . For each genotype we took a  
560 conservative view and used  $N=15$  for computing the errors, so as to avoid their underestimation.

561

#### 562 **A model to compute the contribution of BRAVO and WOX5 to regulate QC division**

563 We aim at evaluating the contribution of BRAVO and WOX5 on regulating QC divisions. To  
564 this end we propose the following function:

$$F = \frac{F_0}{1 + T_B + T_W + T_{BW}}$$

565 which indicates the frequency at which we found a QC with at least one QC cell that is divided  
566 in the plane of observation, for roots of the same genotype. This function can be applied to the  
567 WT, to each single mutant and to the double mutant.  $T_B$ ,  $T_W$  and  $T_{BW}$  are the contributions

568 mediated by BRAVO, by WOX5 and jointly by both BRAVO and WOX5, on the regulation of  
 569 QC division, such that in the *wox5* mutant we have  $T_W = 0$  and  $T_{BW} = 0$ , while in the *bravo*  
 570 mutant we have  $T_B = 0$  and  $T_{BW} = 0$ . Notice that for each of these contributions, it corresponds  
 571 to repression of QC divisions when it takes positive values. In contrast, it corresponds to  
 572 induction of QC divisions for negative values. This function takes the following expressions in  
 573 the WT and in the mutants:

$$F^{WT} = \frac{F_0}{1 + T_B^{WT} + T_W^{WT} + T_{BW}^{WT}}$$

$$F^{Bm} = \frac{F_0}{1 + T_W^{Bm}} = \frac{F_0}{1 + T_W^{WT} q_W^{Bm}}$$

$$F^{Wm} = \frac{F_0}{1 + T_B^{Wm}} = \frac{F_0}{1 + T_B^{WT} q_B^{Wm}}$$

$$F^{dm} = F_0$$

574 where superindexes WT, Bm, Wm account for WT, *bravo* mutant and *wox5* mutant,  
 575 respectively.

576  $q_B^{Wm}$  parameter measures the change in the strength of the contribution of BRAVO-mediated  
 577 effects on QC division in the *wox5* mutant compared to its strength in the WT (i.e. the strength  
 578 with which BRAVO inhibits QC division in the *wox5* mutant is  $T_B^{Wm} = T_B^{WT} q_B^{Wm}$  ).  
 579 Analogously,  $q_W^{Bm}$  parameter measures the change in the strength of the repression that WOX5  
 580 does on QC division in the *bravo* mutant compared to the strength it does on the WT. Notice  
 581 that we assume no additional changes happen in the  $F$  function in these mutants.

582 From these equations and using the empirical data ( $F^{WT} = a$ ,  $F^{Bm} = b$ ,  $F^{Wm} = c$ ,  $F^{dm} = d$ , we  
 583 can extract the values of  $T_B^{WT}$ ,  $T_W^{WT}$  and  $T_{BW}^{WT}$  by first writing down the ratios between these  
 584 quantities:

$$\frac{F^{Bm}}{F^{WT}} = \frac{1 + T_B^{WT} + T_W^{WT} + T_{BW}^{WT}}{1 + T_W^{WT} q_W^{Bm}} = \frac{b}{a}$$

$$\frac{F^{Wm}}{F^{WT}} = \frac{1 + T_B^{WT} + T_W^{WT} + T_{BW}^{WT}}{1 + T_B^{WT} q_B^{Wm}} = \frac{c}{a}$$

$$\frac{F^{dm}}{F^{WT}} = 1 + T_B^{WT} + T_W^{WT} + T_{BW}^{WT} = \frac{d}{a}$$

585 and then isolating each term, such that the following is found:

$$T_B^{WT} \pm \delta T_B^{WT} = \frac{1}{q_B^{Wm}} \left( \frac{d}{c} - 1 \right) \pm \frac{1}{q_B^{Wm}} \sqrt{\left( \frac{\delta d}{c} \right)^2 + \left( \frac{d}{c^2} \delta c \right)^2}$$

$$T_W^{WT} \pm \delta T_W^{WT} = \frac{1}{q_W^{Bm}} \left( \frac{d}{b} - 1 \right) \pm \frac{1}{q_W^{Bm}} \sqrt{\left( \frac{\delta d}{b} \right)^2 + \left( \frac{d}{b^2} \delta b \right)^2}$$

$$\begin{aligned} & T_{BW}^{WT} \pm \delta T_{BW}^{WT} \\ &= \frac{d}{a} - 1 - \frac{1}{q_B^{Wm}} \left( \frac{d}{c} - 1 \right) - \frac{1}{q_W^{Bm}} \left( \frac{d}{b} - 1 \right) \\ & \pm \sqrt{\left( \delta d \left( \frac{1}{a} - \frac{1}{q_B^{Wm} c} - \frac{1}{q_W^{Bm} b} \right) \right)^2 + \left( \frac{d}{a^2} \delta a \right)^2 + \left( \frac{d}{q_W^{Bm} b^2} \delta b \right)^2 + \left( \frac{d}{q_B^{Wm} c^2} \delta c \right)^2} \end{aligned}$$

586

587 where the errors had been estimated using error propagation of the errors in  $a, b, c$  and  $d$  and

588 assuming their independency. In Figure 5, continuous lines correspond to the best estimated

589 values (e.g.  $T_B^{WT} = \frac{1}{q_B^{Wm}} \left( \frac{d}{c} - 1 \right)$ ), and the shaded area represents the range within the errors

590 (e.g.  $T_B^{WT} \pm \delta T_B^{WT}$ ). Although effective parameters  $q_B^{Wm}$  and  $q_W^{Bm}$  cannot be directly measured,

591 we reasoned from the comparison of the phenotypes of *bravo* and of *wox5* mutants that  $q_W^{Bm}$

592 should be relatively large. As an estimate for its exact value, we used the fold-change of *WOX5*

593 expression in the *bravo* mutant compared to the WT and set  $q_W^{Bm} = \sigma_B^\dagger = 0.8$ . We then explored

594 all possible values of  $q_W^{Bm}$  from 0 (the contribution of *WOX5* in repressing divisions is

595 eliminated completely in *bravo* mutant) to 1 (the contribution of *WOX5* is the same in *bravo*

596 mutant and in WT).

597

598

599



600 **FIGURE LEGENDS**

601

602 **Figure 1: BRAVO and WOX5 are required for the QC identity and stem cells**  
603 **maintenance.**

604 **A-D)** Confocal images of mPS-PI stained 6-day-old seedlings of Col-0 (A), *bravo-2* (B), *wox5-*  
605 *1* (C) and *bravo-2 wox5-1* (D) mutants. Left black arrows indicate QC cells and right white  
606 arrows indicate CSC. Scale bar: 50  $\mu$ m.

607 **E)** Quantification of the QC divisions in 6-day-old roots expressed in percentage (n>50, 3  
608 replicates). D: QC divided; ND: QC non divided.

609 **F)** Quantification of CSC layers in 6-day-old roots expressed in percentage (n>50, 3 replicates).

610 **G)** Lateral root density (number of lateral roots per mm of root length) of 7-day-old WT, *bravo-*  
611 *2*, *wox5-1* and *bravo-2 wox5-1* mutants (n>40, 2 replicates). Different letters indicate  
612 statistically significant differences (p-value < 0.05 Student's t-test).

613

614 **Figure 2: BRAVO and WOX5 reinforce each other at the root stem cell niche.**

615 **A-G)** Confocal images of PI-stained 6-day-old roots. GFP-tagged expression is shown in green.  
616 A-C) *pBRAVO:GFP* in WT (A), *bravo-2* (B) and *wox5-1* (C) knockout backgrounds. D-G)  
617 *pWOX5:GFP* in the WT (D), *bravo-2* (E), *wox5-1* (F) and *bravo-2 wox5-1* (G) knockout  
618 backgrounds. Scale bar: 50  $\mu$ m.

619 **H, I)** Quantification of the GFP fluorescent signal of the roots in A-C (H) and D-G (I). Boxplot  
620 indicating the average pixel intensity of the GFP in the stem cell niche. (n>25, 3 biological  
621 replicates, \*p-value < 0.05 Student's t-test for each genotype versus the WT in the same  
622 condition).

623

624 **Figure 3: WOX5 activates BRAVO, which in turn alleviates WOX5 self-inhibition in the**  
625 **stem cell niche.**

626 **A)** Schematic representation of the effective regulations in the SCN between *BRAVO* and  
627 *WOX5*: *BRAVO* feeds back on its own activity by reducing it and is activated by *WOX5*. *WOX5*  
628 also feeds back on its own activity by reducing it, a regulation that becomes partially impaired  
629 by *BRAVO*. Additional factors  $x$  can be regulating both *BRAVO* and *WOX5* or either one. We  
630 exemplify one such a factor that regulates both, by downregulating *BRAVO* and upregulating  
631 *WOX5*.  $x$  can be understood as BR signaling. Arrows denote activation and bar-ended lines  
632 denote inhibition.

633 **B)** Model solutions for the temporal evolution of expression and promoter activities for the WT  
634 and mutants using as initial condition all activities set to zero ( $B(t=0)=0, W(t=0)=0$ ) and  
635 parameter values as in Table S1. This time-evolution does not intend to mimic any data but is  
636 only shown to depict the changes in the stationary levels between WT and each mutant.  
637 Manifest in the panels are the fold-changes in promoter activities in the mutant compared to the  
638 WT ( $\sigma$ ) as defined in Material and Methods.

639 **C)** Fold-changes in promoter activity ( $\sigma$ ) in the mutant compared to the WT predicted by the  
640 mathematical model as a function of the control parameter  $x$ . This control parameter increases  
641 *WOX5* and reduces *BRAVO* promoter activities (blue and red triangles; according to  $\alpha=0.3/x$ ,  
642  $\gamma=250x/(x+9)$ ).  $x=1$  corresponds to the CTL condition, while  $x>1$  can mimic BL conditions  
643 (green shaded area). The experimentally observed values in CTL conditions (computed as ratios  
644 of the median GFP) are drawn as black markers (see legend). The experimental fold-changes  
645 corresponding to the double mutants are not shown, as are assumed to be equal to the single  
646 mutants within the confidence interval of the experiments ( $\sigma_B^{\dagger exp} = \sigma_B^{exp}$  and  $\sigma_W^{\dagger exp} =$   
647  $\sigma_W^{exp}$ ). Error bars of these data (which can span ranges  $\pm\sigma$ ) are not depicted for clarity. In the  
648 plot, the region of fold change  $FC<1$  (i.e. the promoter activity is reduced in the mutant) is  
649 shaded in gray to visually distinguish it from the region where  $FC>1$  (i.e. the promoter activity  
650 is increased in the mutant).

651

652 **Figure 4: BRAVO interacts with WOX5.**

653 **A-J)** Interaction of BRAVO with WOX5 (B), BES1 (C), BES1-D (D) and TPL (E); and  
654 interaction of WOX5 with BRAVO (G), BES1 (H), BES1-D (I) and TPL (J) measured by  
655 FRET-FLIM. GFP fluorescence lifetime  $\tau$  [ns] was measured in transiently expressing  
656 *Nicotiana benthamiana* leaf epidermal cells. GFP fluorescence lifetime fitted pixel-wise with a  
657 mono-exponential model of BRAVO and WOX5 interactions. mV, mVenus; mCh, mCherry.  
658 Scale bar: 5  $\mu\text{m}$ .

659 **K)** Fluorescence-weighted average lifetimes of BRAVO and WOX5 interactions fitted with a  
660 double-exponential model of the indicated samples are summarized in box plots. Statistical  
661 significance was tested by one-way ANOVA with a Sidakholm post-hoc test. Different letters  
662 indicate statistically significant differences ( $p < 0.01$ ;  $n > 20$ ).

663 **L)** Yeast two-hybrid assay showing BRAVO interacting with WOX5, BES1-D and TPL. In the  
664 left column yeast cells were grown on control media, and in the right column yeast cells were  
665 grown on control media lacking Leu, Trp and His, indicating an interaction between the  
666 proteins.

667

668 **Figure 5: BRAVO and WOX5 have a joint role in repressing QC divisions.**

669 **A)** Computational estimation of the contributions of BRAVO-mediated ( $T_B^{WT}$ ), WOX5-  
670 mediated ( $T_W^{WT}$ ) and BRAVO-WOX5 joint ( $T_{BW}^{WT}$ ) regulations of QC divisions in the WT, as a  
671 function of the attenuating factor of BRAVO contribution in the *wox5* mutant,  $q_B^{Wm}$ .  
672 Continuous lines represent the best estimated values, while dashed lines are the enveloping  
673 confidence intervals (e.g.  $T_B^{WT} \pm \delta T_B^{WT}$ ). The horizontal grey dashed lines mark the zero lines.  
674 For a wide range of  $q_B^{Wm}$  values, the joint contribution of BRAVO and WOX5 is important,  
675 while the individual contribution of BRAVO only increases for small values of  $q_B^{Wm}$ . In all  
676 three panels, we set  $q_W^{Bm} = 0.8$ . Positive contributions correspond to repression of QC divisions,  
677 while negative contributions correspond to activation of QC divisions.

678 **B)** Sketch representing the spatial distribution of BRAVO, WOX5 and their product BRAVO x  
679 WOX5, which can be interpreted as the protein complex. Their joint interaction peaks at the  
680 QC, where repression of cell division occurs.

681

## 682 **SUPPLEMENTARY FIGURES AND TABLES**

### 683 **Figure S1: Medial longitudinal view of the *Arabidopsis thaliana* primary root apex.**

684 Schematic representation of a 6-day-old primary root. At the root apex the stem cell niche is  
685 formed by the quiescent center (QC) and the surrounding stem cells, which are highlighted in  
686 different colors.

687

### 688 **Figure S2: BRAVO and WOX5 promote primary root growth and lateral root** 689 **development.**

690 **A)** Root length of 6-day-old WT and *bravo-2 wox5-1* mutants in control and after BL treatment  
691 ( $n > 30$ , 3 replicates). Different letters indicate statistically significant differences ( $p$ -value  $< 0.05$   
692 Student's t-test).

693 **B)** Lateral root density (number of lateral roots per mm of root length) of 10-day-old  
694 WT, *bravo-2*, *wox5-1* and *bravo-2 wox5-1* mutants ( $n > 52$ , 3 replicates). Different letters  
695 indicate statistically significant differences ( $p$ -value  $< 0.05$  Student's t-test).

696

### 697 **Figure S3: BRAVO and WOX5 expression patterns in overexpressor lines.**

698 **A)** Bars show the relative expression of BRAVO and WOX5 in 35S:WOX5-GR lines when  
699 induced with  $1\mu\text{M}$  Dexamethasone for 24 hours. Values in control conditions are not  
700 represented as are 1. Data obtained from two independent biological replicates. Asterisks  
701 indicate significant differences (\*  $p$ -value  $< 0.05$ , \*\*\*  $p$ -value  $< 0.001$  Student's t-test).

702 **B)** Bars show the relative expression of BRAVO and WOX5 in 35S:BRAVO-Ei lines when  
703 induced with 30  $\mu$ M  $\beta$ -estradiol for 24 hours. Values in control conditions are not represented as  
704 are 1. Data obtained from three independent biological replicates. Asterisks indicate significant  
705 differences (\*\* p-value < 0.01 Student's t-test).

706 **C)** Quantification of the GFP fluorescent signal of the roots in D-G. Boxplot indicating the  
707 average pixel intensity of the GFP in the stem cell niche. (n>29, 3 biological replicates,  
708 Different letters indicate statistical significant differences (p-value < 0.05 Student's t-test).

709 **D-G)** Confocal images of PI-stained 6-day-old roots. GFP-tagged expression is shown in green.  
710 pWOX5:GFP in WT and 35S:BRAVO-Ei background in control (D, F) and after 6 days 30  $\mu$ M  
711  $\beta$ -estradiol induction (E, G). Scale bar: 50  $\mu$ m.

712

713 **Figure S4: BRAVO expression in the *bravo wox5* mutant background.**

714 **A-D)** Confocal images of PI-stained 6-day-old roots. GFP-tagged expression is shown in green.  
715 pBRAVO:GFP in WT and *bravo-2 wox5-1* background in control (A, C) and after BL treatment  
716 (B, D). Scale bar: 50  $\mu$ m.

717 **E)** Quantification of the GFP fluorescent signal of the roots in A-D in the stem cell niche.  
718 Different letters indicate statistically significant differences (p-value < 0.05 Student's t-test).

719

720 **Figure S5: BRAVO and WOX5 expression is BL regulated.**

721 **A-N)** Confocal images of PI-stained 6-day-old roots. GFP-tagged expression is shown in green.  
722 **A-C)** pBRAVO:GFP in WT, *bravo-2* and *wox5-1* knockout backgrounds in CTL (A-C) and after  
723 48h 4nM BL treatment (D-F). **G-N)** pWOX5:GFP in WT, *bravo-2*, *wox5-1* and *bravo-2 wox5-1*  
724 knockout backgrounds in CTL (G-J) and after 48h 4 nM BL treatment (K-N). Images in control  
725 conditions are the same that are shown in figure 2. Scale bar: 50  $\mu$ m.

726 **O, P)** Quantification of the GFP fluorescent signal of the roots in A-F (O) and G-N (P). Boxplot  
727 indicating the average pixel intensity of the GFP in the stem cell niche. ( $n > 25$ , 3 biological  
728 replicates, \* $p$ -value  $< 0.05$  Student's  $t$ -test for each genotype versus the WT in the same  
729 condition). Quantification of lines in control conditions are the same that are shown in figure 2.

730

731 **Figure S6: Biochemical interactions of BRAVO and WOX5 with BES1 and TPL.**

732 **A)** Yeast two-hybrid assay showing BRAVO interactions with WOX5, BES1 and TPL *in vitro*.  
733 In the left column yeast cells were grown on control media, and in the right column yeast cells  
734 were grown on control media lacking Leu, Trp and His, indicating an interaction between the  
735 proteins.

736 **B-D)** *In planta* interaction by Bimolecular Fluorescence Complementation assay (BiFC).  
737 Confocal images were merged with red fluorescence images corresponding to chlorophyll.  
738 Fluorescence was detected 48 h post agroinfiltration. Scale bar: 50  $\mu$ m. B) BiFC showing  
739 BRAVO interaction with BES1 and TPL. Nuclear YFP fluorescence is observed in *N.*  
740 *benthamiana* leaves infiltrated with the BRAVO-eYFPC and both BES1 and TPL-eYFPN  
741 constructs. BRAVO-eYFPC and empty-eYFPN are included as a negative control. C) BiFC  
742 showing WOX5 interaction with BES1 and TPL. Nuclear YFP fluorescence is observed in *N.*  
743 *benthamiana* leaves infiltrated with the WOX5-eYFPN and both BES1 and TPL-eYFPC  
744 constructs. WOX5-eYFPN and empty-eYFPC are included as a negative control. D) BES1-  
745 eYFPC and TPL-eYFPN was included as a positive control of interaction. Scale bar: 50  $\mu$ m.

746

747 **Figure S7: ROIs used for the quantification of the GFP.**

748 **A-B)** Confocal images of *pBRAVO:GFP* (A) and *pWOX5:GFP* (B) PI-stained 6-day-old roots.  
749 GFP-tagged expression is shown in green. Insets show the GFP channels that were used for the  
750 quantification. Only the area inside the yellow circle was used for the GFP quantification.

751

752 **Table S1. Parameter values for the model of BRAVO and WOX5, used to generate the**  
753 **data in Figure 3.**

754 Parameter values used to perform the numerical simulations. All are in arbitrary units. The  
755 right-most column indicates the concentration and time scales in which these values could be  
756 meaningful in a biological context.

757

758 **Table S2. List of plant material lines used in this study.**

759 **Table S3. List of primers used in this study.**

760

## 761 SUPPLEMENTARY TEXT

### 762 Model

763 For the WT genotype, the model reads (see Material and Methods):

$$\frac{dB}{dt} = P_B(B, W) - d_B B$$

764

$$765 \quad P_B(B, W) = \alpha \frac{1 + \varepsilon_B (K_B B)^2}{1 + (K_B B)^2} \frac{1 + \varepsilon_W (K_W W)^2}{1 + (K_W W)^2}$$

766

$$\frac{dW}{dt} = P_W(B, W) - d_W W$$

767

$$768 \quad P_W(B, W) = \gamma \frac{1}{W_0^2 + W^2 \left( \frac{1}{B^2 + B_0^2} + W_1 \right)^2}$$

769

770 For the *wox5* mutant (where superscript *Wm* denotes this mutant) the model reads (it has

771  $W^{Wm} = 0$ ):

$$\frac{dB^{Wm}}{dt} = P_W(B^{Wm}, 0) - d_B B^{Wm}$$

772

773 
$$P_B(B^{Wm}, 0) = \alpha \frac{1 + \varepsilon_B (K_B B^{Wm})^2}{1 + (K_B B^{Wm})^2},$$

774

775 
$$W^{Wm} = 0,$$

$$P_W(B^{Wm}, 0) = \gamma \frac{1}{W_0^2}$$

776

777 The model for *bravo* mutant (where superscript *Bm* denotes this mutant) has  $B^{Bm} = 0$  and

778 reads:

779 
$$B^{Bm} = 0,$$

780 
$$P_B(0, W^{Bm}) = \alpha \frac{1 + \varepsilon_W (K_W W^{Bm})^2}{1 + (K_W W^{Bm})^2},$$

781

782 
$$\frac{dW^{Bm}}{dt} = P_W(0, W^{Bm}) - d_W W^{Bm},$$

783

784 
$$P_W(0, W^{Bm}) = \gamma \frac{1}{W_0^2 + W^{Bm} \left( \frac{1}{B_0^2} + W_1 \right)^2}$$

785

786 Finally, for the double *bravo wox5* mutant (superscript *dm*) the model reads:

787 
$$B^{dm} = 0, W^{dm} = 0$$

788 
$$P_B(0,0) = \alpha, \quad P_W(0,0) = \gamma \frac{1}{W_0^2} = P_W(0, W^{Bm})$$

789

## 790 **Stationary solutions**

791 For each genotype, the stationary solutions are found by imposing the stationarity condition:

792 
$$\frac{dB}{dt} = 0 \quad \text{and} \quad \frac{dW}{dt} = 0,$$
 of the equations that describe each genotype.

793 For the WT, when we impose the stationary conditions the following set of two coupled

794 algebraic equations is obtained in the stationary state:



$$d_B B^{WT} = \alpha \left( \frac{1 + \varepsilon_B (K_B B^{WT})^2}{1 + (K_B B^{WT})^2} \right) \left( \frac{1 + \varepsilon_W (K_W W^{WT})^2}{1 + (K_W W^{WT})^2} \right)$$

$$d_W W^{WT} = \gamma \left( \frac{1}{W_0^2 + (W^{WT})^2 \left( \frac{1}{B_0^2 + (B^{WT})^2} + W_1 \right)^2} \right)$$

795 which is solved numerically (see Material and Methods). We denote by  $B^{WT}, W^{WT}$  the  
 796 stationary solutions for the expression of *BRAVO* and *WOX5* in the WT. The stationary *BRAVO*  
 797 and *WOX5* promoter activities in the WT are:

$$P_B^{WT} \equiv P_B(B^{WT}, W^{WT}) = \alpha \left( \frac{1 + \varepsilon_B (K_B B^{WT})^2}{1 + (K_B B^{WT})^2} \right) \left( \frac{1 + \varepsilon_W (K_W W^{WT})^2}{1 + (K_W W^{WT})^2} \right)$$

$$P_W^{WT} \equiv P_W(B^{WT}, W^{WT}) = \gamma \left( \frac{1}{W_0^2 + (W^{WT})^2 \left( \frac{1}{B_0^2 + (B^{WT})^2} + W_1 \right)^2} \right)$$

798 where, once we have the stationary values  $B^{WT}, W^{WT}$  we can obtain their values by  
 799 substitution on the above expressions.

800 We proceed in the same way with each mutant with their corresponding equations set to the  
 801 stationary state.

802 For the *wox5* mutant, we have  $W^{Wm} = 0$ , and the stationary expression of *BRAVO* satisfies

$$803 \quad B^{Wm} = \frac{\alpha}{d_B} \frac{1 + \varepsilon_B (K_B B^{Wm})^2}{1 + (K_B B^{Wm})^2}$$

804 which is solved numerically. The stationary *BRAVO* and *WOX5* promoter activities  
 805 (productions) in this mutant are:

$$806 \quad P_B^{Wm} = \alpha \frac{1 + \varepsilon_B (K_B B^{Wm})^2}{1 + (K_B B^{Wm})^2},$$

807

$$808 \quad P_W^{Wm} = \gamma \frac{1}{W_0^2}.$$

809

810 For the *bravo* mutant in the stationary state we have  $B^{Bm} = 0$ , and

$$W^{Bm} = \frac{\gamma}{d_W} \frac{1}{W_0^2 + W^{Bm^2} \left( \frac{1}{B_0^2} + W_1 \right)^2}$$

811 which is solved numerically. Once solved, the stationary promoter activities in this mutant are

812 found as:

$$813 \quad P_B^{Bm} = \alpha \frac{1 + \varepsilon_W (K_W W^{Bm})^2}{1 + (K_W W^{Bm})^2},$$

$$814 \quad P_W^{Bm} = \gamma \frac{1}{W_0^2 + W^{Bm^2} \left( \frac{1}{B_0^2} + W_1 \right)^2}$$

815 Finally, the model of the double *bravo wox5* mutant already indicates the stationary state

816 values:

$$817 \quad B^{dm} = 0, W^{dm} = 0$$

$$818 \quad P_B^{dm} = \alpha, \quad P_W^{dm} = \gamma \frac{1}{W_0^2} = P_W^{Wm}.$$

819

820

821 **REFERENCES**

- 822 Aida M, Beis D, Heidstra R, Willemsen V, Blilou I, Galinha C, Nussaume L, Noh YS, Amasino  
823 R, Scheres B (2004) The PLETHORA genes mediate patterning of the Arabidopsis root stem  
824 cell niche. *Cell* **119**: 109-120
- 825 Banda J, Bellande K, von Wangenheim D, Goh T, Guyomarc'h S, Laplaze L, Bennett MJ  
826 (2019) Lateral Root Formation in Arabidopsis: A Well-Ordered L-Rexit. *Trends in plant science*  
827 **24**: 826-839
- 828 Bennett T, van den Toorn A, Willemsen V, Scheres B (2014) Precise control of plant stem cell  
829 activity through parallel regulatory inputs. *Development* **141**: 4055-4064
- 830 Betegon-Putze I, Gonzalez A, Sevillano X, Blasco-Escamez D, Cano-Delgado AI (2019)  
831 MyROOT: a method and software for the semiautomatic measurement of primary root length in  
832 Arabidopsis seedlings. *The Plant journal : for cell and molecular biology* **98**: 1145-1156
- 833 Bleckmann A, Weidtkamp-Peters S, Seidel CA, Simon R (2010) Stem cell signaling in  
834 Arabidopsis requires CRN to localize CLV2 to the plasma membrane. *Plant Physiol* **152**: 166-  
835 176
- 836 Burkart RC, Strotmann VI, Kirschner GK, Akinci A, Czempik L, Maizel A, Weidtkamp-Peters  
837 S, Stahl Y (2019) PLETHORA and WOX5 interaction and subnuclear localisation regulates  
838 Arabidopsis root stem cell maintenance. *bioRxiv*
- 839 Clark NM, Buckner E, Fisher AP, Nelson EC, Nguyen TT, Simmons AR, de Luis Balaguer  
840 MA, Butler-Smith T, Sheldon PJ, Bergmann DC, Williams CM, Sozzani R (2019) Stem-cell-  
841 ubiquitous genes spatiotemporally coordinate division through regulation of stem-cell-specific  
842 gene networks. *Nature communications* **10**: 5574
- 843 De Rybel B, Mahonen AP, Helariutta Y, Weijers D (2016) Plant vascular development: from  
844 early specification to differentiation. *Nature reviews Molecular cell biology* **17**: 30-40
- 845 Dolan L, Janmaat K, Willemsen V, Linstead P, Poethig S, Roberts K, Scheres B (1993) Cellular  
846 organisation of the Arabidopsis thaliana root. *Development* **119**: 71-84
- 847 Espinosa-Ruiz A, Martinez C, de Lucas M, Fabregas N, Bosch N, Cano-Delgado AI, Prat S  
848 (2017) TOPLESS mediates brassinosteroid control of shoot boundaries and root meristem  
849 development in Arabidopsis thaliana. *Development (Cambridge, England)*
- 850 Forzani C, Aichinger E, Sornay E, Willemsen V, Laux T, Dewitte W, Murray JA (2014) WOX5  
851 suppresses CYCLIN D activity to establish quiescence at the center of the root stem cell niche.  
852 *Current biology : CB* **24**: 1939-1944

- 853 Fulcher N, Sablowski R (2009) Hypersensitivity to DNA damage in plant stem cell niches.  
854 *Proceedings of the National Academy of Sciences of the United States of America* **106**: 20984-  
855 20988
- 856 Gietz RD, Woods RA (2002) Transformation of yeast by lithium acetate/single-stranded carrier  
857 DNA/polyethylene glycol method. *Methods in enzymology* **350**: 87-96
- 858 Goh T, Toyokura K, Wells DM, Swarup K, Yamamoto M, Mimura T, Weijers D, Fukaki H,  
859 Laplaze L, Bennett MJ, Guyomarc'h S (2016) Quiescent center initiation in the Arabidopsis  
860 lateral root primordia is dependent on the SCARECROW transcription factor. *Development*  
861 **143**: 3363-3371
- 862 Gonzalez-Garcia MP, Vilarrasa-Blasi J, Zhiponova M, Divol F, Mora-Garcia S, Russinova E,  
863 Cano-Delgado AI (2011) Brassinosteroids control meristem size by promoting cell cycle  
864 progression in Arabidopsis roots. *Development* **138**: 849-859
- 865 Lozano-Elena F, Planas-Riverola A, Vilarrasa-Blasi J, Schwab R, Cano-Delgado AI (2018)  
866 Paracrine brassinosteroid signaling at the stem cell niche controls cellular regeneration. *Journal*  
867 *of cell science* **131**
- 868 Occhialini A, Gouzerh G, Di Sansebastiano GP, Neuhaus JM (2016) Dimerization of the  
869 Vacuolar Receptors AtRMR1 and -2 from Arabidopsis thaliana Contributes to Their  
870 Localization in the trans-Golgi Network. *Int J Mol Sci* **17**
- 871 Pi L, Aichinger E, van der Graaff E, Llavata-Peris CI, Weijers D, Hennig L, Groot E, Laux T  
872 (2015) Organizer-Derived WOX5 Signal Maintains Root Columella Stem Cells through  
873 Chromatin-Mediated Repression of CDF4 Expression. *Dev Cell* **33**: 576-588
- 874 Sarkar AK, Luijten M, Miyashima S, Lenhard M, Hashimoto T, Nakajima K, Scheres B,  
875 Heidstra R, Laux T (2007) Conserved factors regulate signalling in Arabidopsis thaliana shoot  
876 and root stem cell organizers. *Nature* **446**: 811-814
- 877 Scheres B (2007) Stem-cell niches: nursery rhymes across kingdoms. *Nature reviews Molecular*  
878 *cell biology* **8**: 345-354
- 879 Shimotohno A, Heidstra R, Blilou I, Scheres B (2018) Root stem cell niche organizer  
880 specification by molecular convergence of PLETHORA and SCARECROW transcription factor  
881 modules. *Genes & development* **32**: 1085-1100
- 882 Stahl Y, Grabowski S, Bleckmann A, Kuhnemuth R, Weidtkamp-Peters S, Pinto KG, Kirschner  
883 GK, Schmid JB, Wink RH, Hulsewede A, Felekyan S, Seidel CA, Simon R (2013) Moderation  
884 of Arabidopsis root stemness by CLAVATA1 and ARABIDOPSIS CRINKLY4 receptor kinase  
885 complexes. *Current biology : CB* **23**: 362-371

- 886 Stahl Y, Wink RH, Ingram GC, Simon R (2009) A signaling module controlling the stem cell  
887 niche in Arabidopsis root meristems. *Current biology : CB* **19**: 909-914
- 888 Tian H, Jia Y, Niu T, Yu Q, Ding Z (2014a) The key players of the primary root growth and  
889 development also function in lateral roots in Arabidopsis. *Plant cell reports* **33**: 745-753
- 890 Tian H, Wabnik K, Niu T, Li H, Yu Q, Pollmann S, Vanneste S, Govaerts W, Rolcik J, Geisler  
891 M, Friml J, Ding Z (2014b) WOX5-IAA17 feedback circuit-mediated cellular auxin response is  
892 crucial for the patterning of root stem cell niches in Arabidopsis. *Molecular plant* **7**: 277-289
- 893 Truernit E, Bauby H, Dubreucq B, Grandjean O, Runions J, Barthelemy J, Palauqui JC (2008)  
894 High-resolution whole-mount imaging of three-dimensional tissue organization and gene  
895 expression enables the study of Phloem development and structure in Arabidopsis. *Plant Cell*  
896 **20**: 1494-1503
- 897 van den Berg C, Willemsen V, Hage W, Weisbeek P, Scheres B (1995) Cell fate in the  
898 Arabidopsis root meristem determined by directional signalling. *Nature* **378**: 62-65
- 899 van den Berg C, Willemsen V, Hendriks G, Weisbeek P, Scheres B (1997) Short-range control  
900 of cell differentiation in the Arabidopsis root meristem. *Nature* **390**: 287-289
- 901 Vilarrasa-Blasi J, Gonzalez-Garcia MP, Frigola D, Fabregas N, Alexiou KG, Lopez-Bigas N,  
902 Rivas S, Jauneau A, Lohmann JU, Benfey PN, Ibanes M, Cano-Delgado AI (2014) Regulation  
903 of plant stem cell quiescence by a brassinosteroid signaling module. *Developmental cell* **30**: 36-  
904 47
- 905 Weidtkamp-Peters S, Stahl Y (2017) The Use of FRET/FLIM to Study Proteins Interacting with  
906 Plant Receptor Kinases. *Methods in molecular biology (Clifton, NJ)* **1621**: 163-175
- 907 Yin Y, Wang ZY, Mora-Garcia S, Li J, Yoshida S, Asami T, Chory J (2002) BES1 accumulates  
908 in the nucleus in response to brassinosteroids to regulate gene expression and promote stem  
909 elongation. *Cell* **109**: 181-191

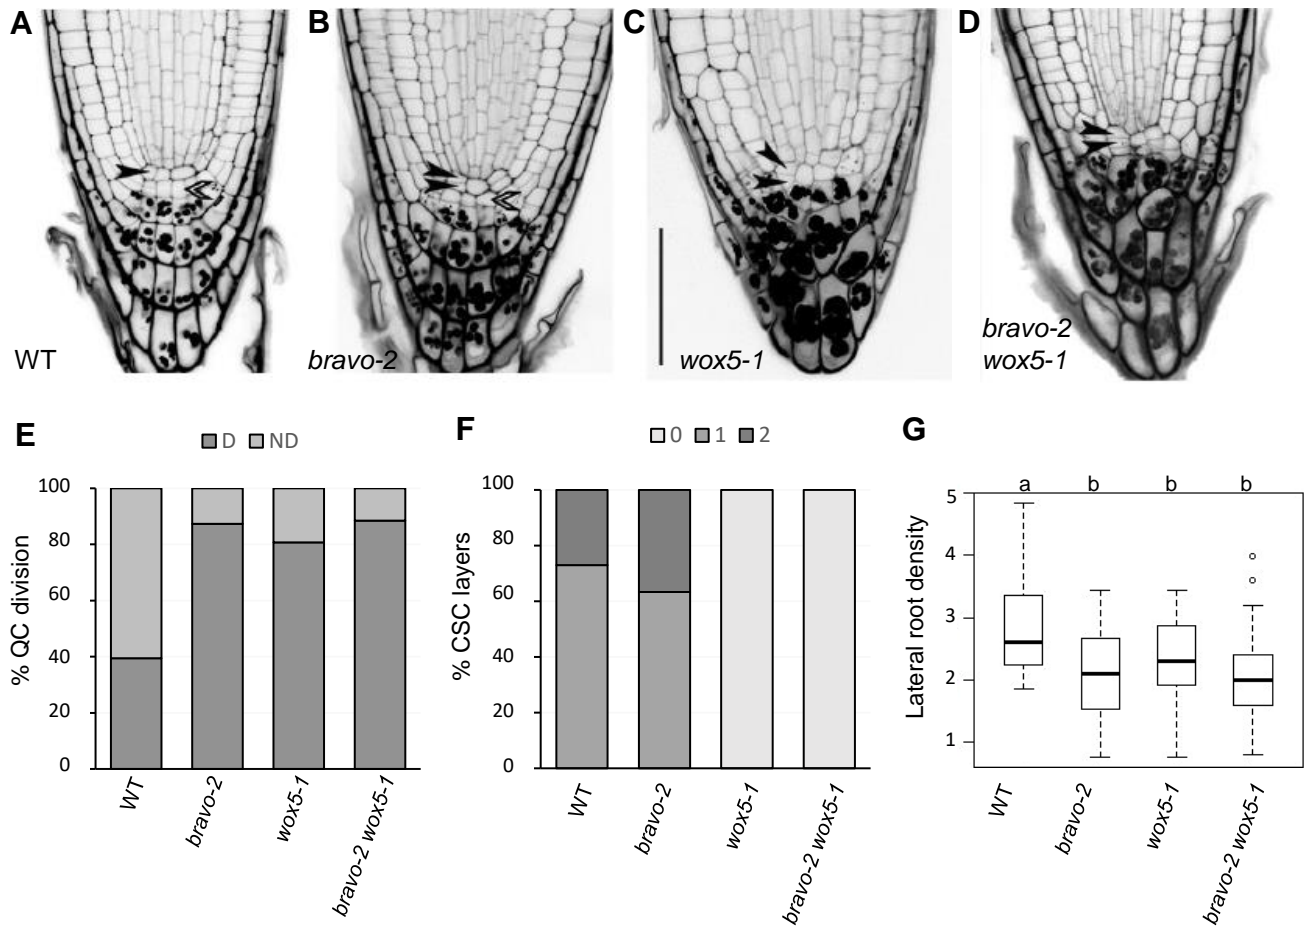

**Figure 1: BRAVO and WOX5 are required for the QC identity and stem cells maintenance.**

**A-D** Confocal images of mPS-PI stained 6-day-old seedlings of Col-0 (A), *bravo-2* (B), *wox5-1* (C) and *bravo-2 wox5-1* (D) mutants. Left black arrows indicate QC cells and right white arrows indicate CSC. Scale bar: 50  $\mu$ m.

**E** Quantification of the QC divisions in 6-day-old roots expressed in percentage ( $n > 50$ , 3 replicates). D: QC divided; ND: QC non divided.

**F** Quantification of CSC layers in 6-day-old roots expressed in percentage ( $n > 50$ , 3 replicates).

**G** Lateral root density (number of lateral roots per mm of root length) of 7-day-old WT, *bravo-2*, *wox5-1* and *bravo-2 wox5-1* mutants ( $n > 40$ , 2 replicates). Different letters indicate statistically significant differences (p-value  $< 0.05$  Student's t-test).

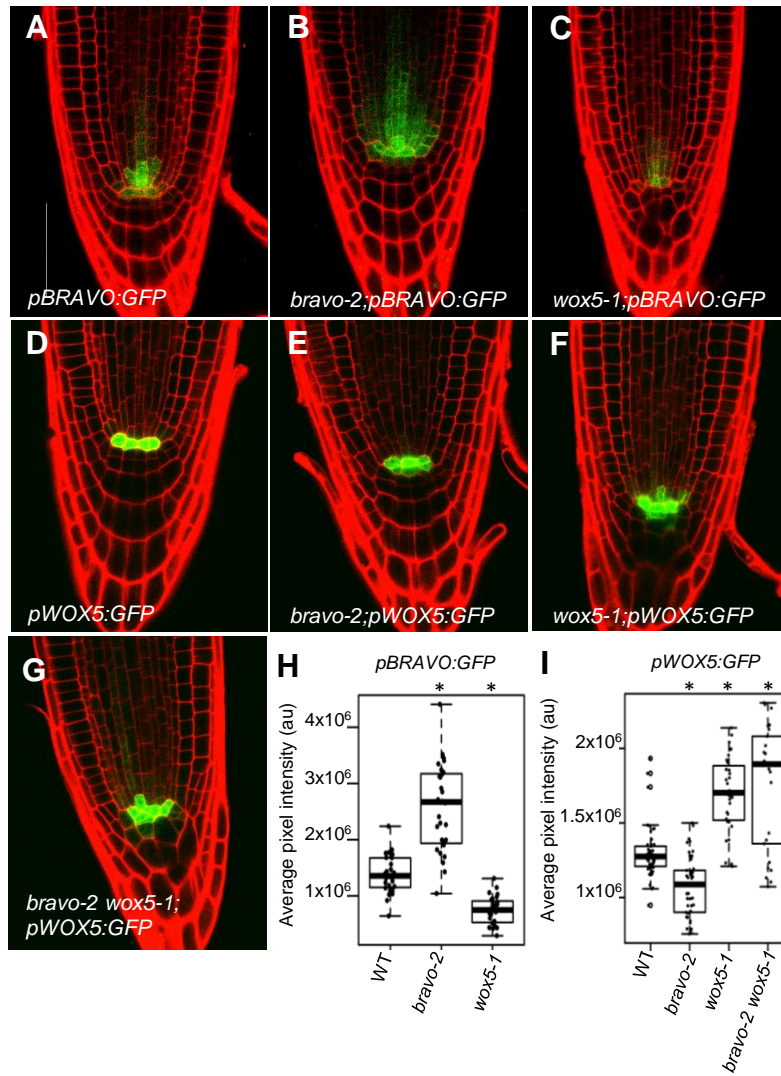

**Figure 2: BRAVO and WOX5 reinforce each other at the root stem cell niche.**

**A-G)** Confocal images of PI-stained 6-day-old roots. GFP-tagged expression is shown in green. A-C) *pBRAVO:GFP* in WT (A), *bravo-2* (B) and *wox5-1* (C) knockout backgrounds. D-G) *pWOX5:GFP* in the WT (D), *bravo-2* (E), *wox5-1* (F) and *bravo-2 wox5-1* (G) knockout backgrounds. Scale bar: 50  $\mu\text{m}$ .

**H, I)** Quantification of the GFP fluorescent signal of the roots in A-C (H) and D-G (I). Boxplot indicating the average pixel intensity of the GFP in the stem cell niche. ( $n > 25$ , 3 biological replicates, \* $p$ -value  $< 0.05$  Student's  $t$ -test for each genotype versus the WT in the same condition).



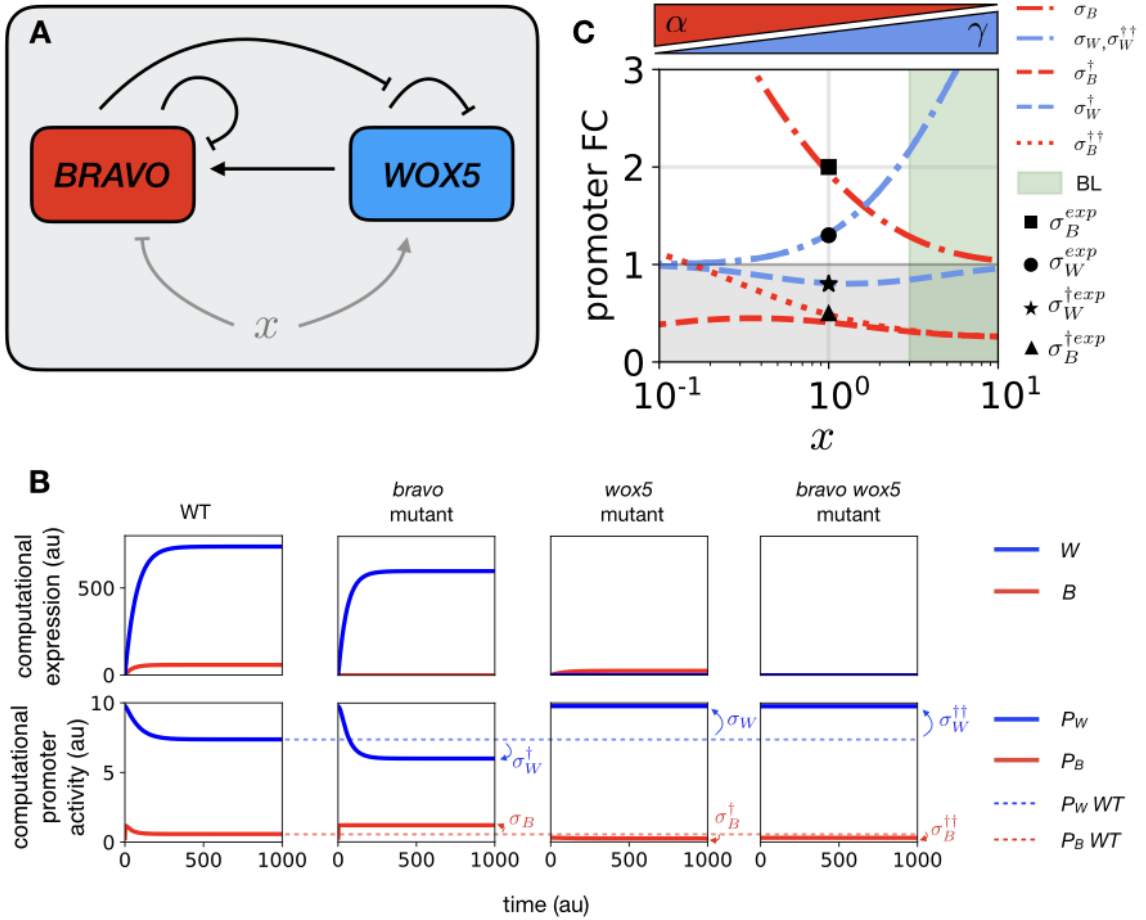

**Figure 3: *WOX5* activates *BRAVO* which in turn alleviates *WOX5* self-inhibition in the stem cell niche.**

**A)** Schematic representation of the effective regulations in the SCN between *BRAVO* and *WOX5*: *BRAVO* feeds back on its own activity by reducing it and is activated by *WOX5*. *WOX5* also feeds back on its own activity by reducing it, a regulation that becomes partially impaired by *BRAVO*. Additional factors  $x$  can be regulating both *BRAVO* and *WOX5* or either one. We exemplify one such a factor that regulates both, by downregulating *BRAVO* and upregulating *WOX5*.  $x$  can be understood as BR signaling. Arrows denote activation and bar-ended lines denote inhibition.

**B)** Model solutions for the temporal evolution of expression and promoter activities for the WT and mutants using as initial condition all activities set to zero ( $B(t=0)=0, W(t=0)=0$ ) and parameter values as in Table S1. This time-evolution does not intend to mimic any data but is only shown to depict the changes in the stationary levels between WT and each mutant. Manifest in the panels are the fold-changes in stationary promoter activities in the mutant compared to the WT ( $\sigma$ ) as defined in Material and Methods.

**C)** Fold-changes in promoter activity ( $\sigma$ ) in the mutant compared to the WT predicted by the mathematical model as a function of the control parameter  $x$ . This control parameter increases *WOX5* and reduces *BRAVO* promoter activities (blue and red triangles; according to  $\alpha=0.3/x, \gamma=250x/(x+9)$ ).  $x=1$  corresponds to the CTL condition, while  $x>1$  can mimic BL condition (green shaded area). The experimentally observed values in CTL conditions (computed as ratios of the median GFP) are drawn as black markers (see legend). The experimental fold-changes corresponding to the double mutants are not shown, as are assumed to be equal to the single mutants within the confidence interval of the experiments ( $\sigma_B^{\dagger\dagger exp} = \sigma_B^{\dagger exp}$  and  $\sigma_W^{\dagger\dagger exp} = \sigma_W^{\dagger exp}$ ). Error bars of these data (which can span ranges  $\pm \sigma$ ) are not depicted for clarity. The experimentally measured fold-change values for the *bravo wox5* double mutants are similar to those measured in the *wox5* mutant. In the plot, the region of fold change  $FC<1$  (i.e. the promoter activity is reduced in the mutant) is shaded in gray to visually distinguish it from the region where  $FC>1$  (i.e. the promoter activity is increased in the mutant).



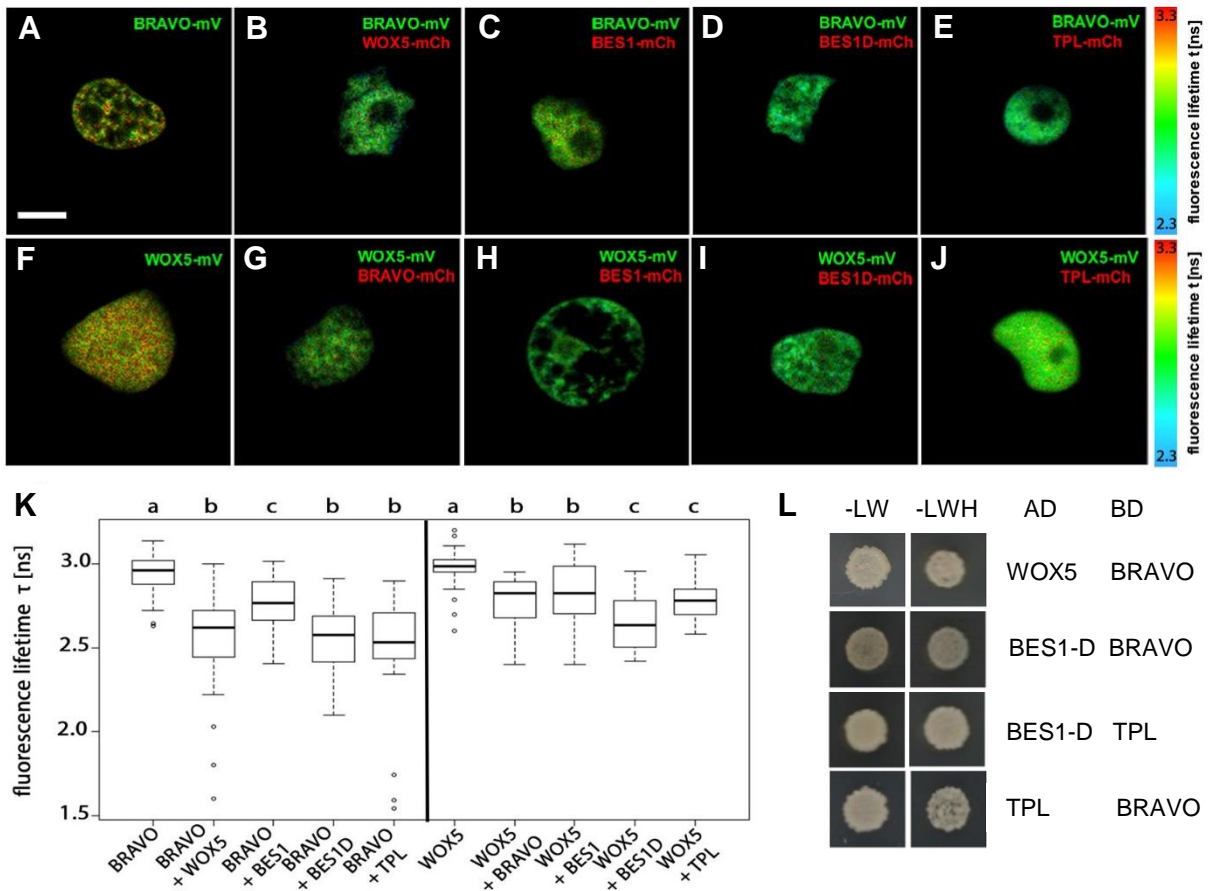

**Figure 4: BRAVO interacts with WOX5.**

**A-J** Interaction of BRAVO with WOX5 (B), BES1 (C), BES1D (D) and TPL (E); and interaction of WOX5 with BRAVO (G), BES1 (H), BES1D (I) and TPL (J) measured by FRET-FLIM. GFP fluorescence lifetime  $\tau$  [ns] was measured in transiently expressing *Nicotiana benthamiana* leaf epidermal cells. GFP fluorescence lifetime fitted pixel-wise with a mono-exponential model of BRAVO and WOX5 interactions. mV, mVenus; mCh, mCherry. Scale bar: 5  $\mu$ m.

**K** Fluorescence-weighted average lifetimes of BRAVO and WOX5 interactions fitted with a double-exponential model of the indicated samples are summarized in box plots. Statistical significance was tested by one-way ANOVA with a Sidakholm post-hoc test. Different letters indicate statistically significant differences ( $p$ -value < 0.01;  $n > 20$ ).

**L** Yeast two-hybrid assay showing BRAVO interacting with WOX5, BES1-D and TPL. In the left column yeast cells were grown on control media, and in the right column yeast cells were grown on control media lacking Leu, Trp and His, indicating an interaction between the proteins.

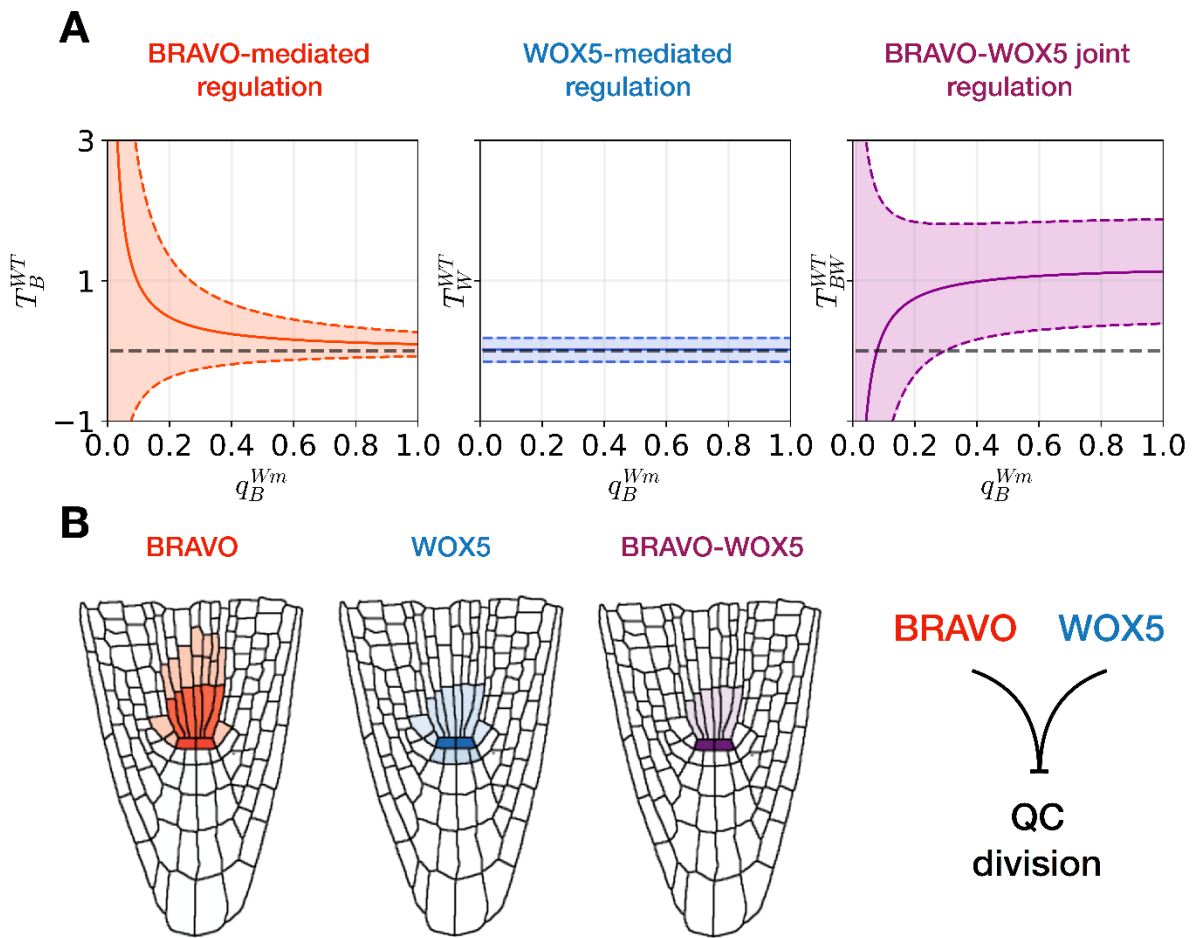

**Figure 5: BRAVO and WOX5 have a joint role in repressing QC divisions.**

**A)** Computational estimation of the contributions of BRAVO-mediated ( $T_B^{WT}$ ), WOX5-mediated ( $T_W^{WT}$ ) and BRAVO-WOX5 joint ( $T_{BW}^{WT}$ ) regulations of QC divisions in the WT, as a function of the attenuating factor of BRAVO contribution in the *wox5* mutant,  $q_B^{Wm}$ . Continuous lines represent the best estimated values, while dashed lines are the enveloping confidence intervals (e.g.  $T_B^{WT} \pm \delta T_B^{WT}$ ). The horizontal grey dashed lines mark the zero lines. For a wide range of  $q_B^{Wm}$  values, the joint contribution of BRAVO and WOX5 is important, while the individual contribution of BRAVO only increases for small values of  $q_B^{Wm}$ . In all three panels, we set  $q_W^{Bm}=0.8$ . Positive contributions correspond to repression of QC divisions, while negative contributions correspond to activation of QC divisions.

**B)** Sketch representing the spatial distribution of BRAVO, WOX5 and their product BRAVO x WOX5, which can be interpreted as the protein complex. Their joint interaction peaks at the QC, where repression of cell division occurs.
